# Supplementary material for: Critical Drug Loss Induced by Silicone and Polyurethane Implantable Catheters in a Simulated Infusion Setup with Three Model Drugs
Source: Pharmaceutics. 2021 Oct 16;13(10):1709. doi: 10.3390/pharmaceutics13101709 (PMC8539077; doi:10.3390/pharmaceutics13101709)
Supplement: Supplementary file 1 [file pharmaceutics-13-01709-s001.zip › supplementary/Raw_data.xlsx]

## Sheet: Catheter - paracetamol
Drug	Reference	Material	Flowrate (mL/h)	Time (hour)	Replicate number	Theoretical concentration (mg/mL)	Initial Concentration (mg/mL)	Concentration at analytical time (mg/mL)	Sorption (mmol/L/dm²)	Remaining percentage	Mean remaining percentage	Standard error of the mean - Remaining percentage	sorption/cm²	Mean sorption/cm²	Standard error of the mean - sorption/cm²
Paracetamol	Blue FlexTip ®	Polyurethane	0	0	1	1	0.988227	1.02564	-0.030535	1.03786	1.0299	0.00411349	-0.467074	-0.368861	0.0507506
Paracetamol	Blue FlexTip ®	Polyurethane	0	0	2	1	0.988227	1.01562	-0.0223549	1.02772			-0.341949
Paracetamol	Blue FlexTip ®	Polyurethane	0	0	3	1	0.988227	1.01206	-0.0194531	1.02412			-0.297561
Paracetamol	Blue FlexTip ®	Polyurethane	0	24	1	1	0.988227	0.907786	0.0656547	0.9186	0.884279	0.0253204	1.00428	1.42771	0.312393
Paracetamol	Blue FlexTip ®	Polyurethane	0	24	2	1	0.988227	0.888779	0.0811678	0.899367			1.24157
Paracetamol	Blue FlexTip ®	Polyurethane	0	24	3	1	0.988227	0.825042	0.133188	0.834871			2.03729
Paracetamol	Blue FlexTip ®	Polyurethane	0	96	1	1	0.988227	0.695326	0.23906	0.70361	0.730622	0.0270123	3.65674	3.32347	0.333267
Paracetamol	Blue FlexTip ®	Polyurethane	0	96	2	1	0.988227	0.775409	0.173698	0.784647			2.65694
Paracetamol	Blue FlexTip ®	Polyurethane	0	96	3	1	0.988227	0.695326	0.23906	0.70361			3.65674
Paracetamol	Blue FlexTip ®	Polyurethane	1	0	1	1	0.988227	0.983625	0.00375565	0.995344	0.992707	0.00216332	0.0574477	0.0899796	0.0266901
Paracetamol	Blue FlexTip ®	Polyurethane	1	0	2	1	0.988227	0.982653	0.00454971	0.994359			0.0695939
Paracetamol	Blue FlexTip ®	Polyurethane	1	0	3	1	0.988227	0.976781	0.00934192	0.988418			0.142897
Paracetamol	Blue FlexTip ®	Polyurethane	1	1	1	1	0.988227	0.979848	0.00683899	0.991521	0.994635	0.00177088	0.104612	0.0661931	0.0218484
Paracetamol	Blue FlexTip ®	Polyurethane	1	1	2	1	0.988227	0.985908	0.00189289	0.997653			0.0289542
Paracetamol	Blue FlexTip ®	Polyurethane	1	1	3	1	0.988227	0.983019	0.00425026	0.99473			0.0650135
Paracetamol	Blue FlexTip ®	Polyurethane	1	2	1	1	0.988227	0.977675	0.00861215	0.989323	0.99111	0.000914783	0.131734	0.109683	0.0112862
Paracetamol	Blue FlexTip ®	Polyurethane	1	2	2	1	0.988227	0.97999	0.00672256	0.991665			0.102831
Paracetamol	Blue FlexTip ®	Polyurethane	1	2	3	1	0.988227	0.980659	0.00617681	0.992342			0.0944827
Paracetamol	Blue FlexTip ®	Polyurethane	1	4	1	1	0.988227	0.994183	-0.00486156	1.00603	1.00289	0.00157171	-0.0743642	-0.0356217	0.0193911
Paracetamol	Blue FlexTip ®	Polyurethane	1	4	2	1	0.988227	0.989407	-0.000962896	1.00119			-0.0147288
Paracetamol	Blue FlexTip ®	Polyurethane	1	4	3	1	0.988227	0.989651	-0.00116185	1.00144			-0.0177721
Paracetamol	Blue FlexTip ®	Polyurethane	1	8	1	1	0.988227	0.985943	0.00186403	0.997689	0.998631	0.00115029	0.0285128	0.0168919	0.0141918
Paracetamol	Blue FlexTip ®	Polyurethane	1	8	2	1	0.988227	0.985543	0.00219056	0.997284			0.0335076
Paracetamol	Blue FlexTip ®	Polyurethane	1	8	3	1	0.988227	0.989136	-0.000741663	1.00092			-0.0113447
Paracetamol	Blue FlexTip ®	Polyurethane	10	0	1	1	0.985058	0.992474	-0.00605287	1.00753	1.00533	0.00113712	-0.0928846	-0.065791	0.0140293
Paracetamol	Blue FlexTip ®	Polyurethane	10	0	2	1	0.985058	0.989734	-0.00381623	1.00475			-0.0585622
Paracetamol	Blue FlexTip ®	Polyurethane	10	0	3	1	0.985058	0.988725	-0.00299281	1.00372			-0.0459263
Paracetamol	Blue FlexTip ®	Polyurethane	10	1	1	1	0.985058	0.992613	-0.00616576	1.00767	1.00763	0.000781693	-0.094617	-0.0941301	0.00964421
Paracetamol	Blue FlexTip ®	Polyurethane	10	1	2	1	0.985058	0.991221	-0.00502998	1.00626			-0.0771878
Paracetamol	Blue FlexTip ®	Polyurethane	10	1	3	1	0.985058	0.993888	-0.00720637	1.00896			-0.110586
Paracetamol	Blue FlexTip ®	Polyurethane	10	2	1	1	0.985058	0.993024	-0.00650115	1.00809	1.0084	0.000400156	-0.0997638	-0.103631	0.00493696
Paracetamol	Blue FlexTip ®	Polyurethane	10	2	2	1	0.985058	0.992859	-0.00636649	1.00792			-0.0976973
Paracetamol	Blue FlexTip ®	Polyurethane	10	2	3	1	0.985058	0.994115	-0.00739191	1.00919			-0.113433
Paracetamol	Blue FlexTip ®	Polyurethane	10	4	1	1	0.985058	0.989882	-0.00393748	1.0049	1.0104	0.00286503	-0.0604228	-0.12834	0.0353475
Paracetamol	Blue FlexTip ®	Polyurethane	10	4	2	1	0.985058	0.99666	-0.00946882	1.01178			-0.145304
Paracetamol	Blue FlexTip ®	Polyurethane	10	4	3	1	0.985058	0.999373	-0.0116837	1.01453			-0.179293
Paracetamol	Blue FlexTip ®	Polyurethane	10	8	1	1	0.985058	0.991579	-0.00532234	1.00662	1.01314	0.00338969	-0.0816742	-0.162103	0.0418206
Paracetamol	Blue FlexTip ®	Polyurethane	10	8	2	1	0.985058	0.999624	-0.0118885	1.01479			-0.182435
Paracetamol	Blue FlexTip ®	Polyurethane	10	8	3	1	0.985058	1.0028	-0.0144797	1.01801			-0.222199
Paracetamol	PowerPicc ®	Polyurethane	0	0	1	1	1.00179	1.00398	-0.00122537	1.00218	1.00217	0.00102374	-0.0184899	-0.0183685	0.0086667
Paracetamol	PowerPicc ®	Polyurethane	0	0	2	1	1.00179	1.00573	-0.0022081	1.00394			-0.0333186
Paracetamol	PowerPicc ®	Polyurethane	0	0	3	1	1.00179	1.00218	-0.0002185	1.00039			-0.003297
Paracetamol	PowerPicc ®	Polyurethane	0	24	1	1	1.00179	0.877309	0.0697142	0.875741	0.882359	0.00407893	1.05193	0.995912	0.034531
Paracetamol	PowerPicc ®	Polyurethane	0	24	2	1	1.00179	0.883115	0.0664629	0.881536			1.00288
Paracetamol	PowerPicc ®	Polyurethane	0	24	3	1	1.00179	0.891392	0.0618272	0.889799			0.932926
Paracetamol	PowerPicc ®	Polyurethane	0	96	1	1	1.00179	0.809963	0.107431	0.808515	0.81216	0.015107	1.62105	1.59019	0.127891
Paracetamol	PowerPicc ®	Polyurethane	0	96	2	1	1.00179	0.841461	0.0897903	0.839958			1.35487
Paracetamol	PowerPicc ®	Polyurethane	0	96	3	1	1.00179	0.789418	0.118936	0.788008			1.79466
Paracetamol	PowerPicc ®	Polyurethane	1	0	1	1	1.00179	1.00131	0.000268349	0.999522	1.00126	0.0016265	0.00404918	-0.0106607	0.0137694
Paracetamol	PowerPicc ®	Polyurethane	1	0	2	1	1.00179	1.00631	-0.00253012	1.00451			-0.0381776
Paracetamol	PowerPicc ®	Polyurethane	1	0	3	1	1.00179	1.00154	0.000142251	0.999746			0.00214646
Paracetamol	PowerPicc ®	Polyurethane	1	1	1	1	1.00179	0.994831	0.0038974	0.993053	0.996119	0.00254266	0.0588088	0.0328556	0.0215254
Paracetamol	PowerPicc ®	Polyurethane	1	1	2	1	1.00179	1.00296	-0.000653937	1.00117			-0.00986742
Paracetamol	PowerPicc ®	Polyurethane	1	1	3	1	1.00179	0.995918	0.00328879	0.994138			0.0496254
Paracetamol	PowerPicc ®	Polyurethane	1	2	1	1	1.00179	1.00094	0.000478685	0.999147	0.997055	0.00112902	0.007223	0.0249319	0.00955795
Paracetamol	PowerPicc ®	Polyurethane	1	2	2	1	1.00179	0.997054	0.00265222	0.995273			0.04002
Paracetamol	PowerPicc ®	Polyurethane	1	2	3	1	1.00179	0.99853	0.00182599	0.996745			0.0275528
Paracetamol	PowerPicc ®	Polyurethane	1	4	1	1	1.00179	0.998416	0.00188956	0.996632	0.996447	0.000637395	0.028512	0.0300749	0.00539598
Paracetamol	PowerPicc ®	Polyurethane	1	4	2	1	1.00179	0.999233	0.00143206	0.997447			0.0216087
Paracetamol	PowerPicc ®	Polyurethane	1	4	3	1	1.00179	0.997044	0.00265778	0.995263			0.0401039
Paracetamol	PowerPicc ®	Polyurethane	1	8	1	1	1.00179	0.999272	0.00141018	0.997487	1.00077	0.0017942	0.0212785	-0.00648131	0.0151891
Paracetamol	PowerPicc ®	Polyurethane	1	8	2	1	1.00179	1.00546	-0.00205751	1.00367			-0.0310463
Paracetamol	PowerPicc ®	Polyurethane	1	8	3	1	1.00179	1.00294	-0.000641258	1.00114			-0.0096761
Paracetamol	PowerPicc ®	Polyurethane	10	0	1	1	0.999759	1.00163	-0.00104983	1.00188	1.00083	0.000867746	-0.0158733	-0.00703984	0.00734607
Paracetamol	PowerPicc ®	Polyurethane	10	0	2	1	0.999759	0.998868	0.000498949	0.999109			0.00754406
Paracetamol	PowerPicc ®	Polyurethane	10	0	3	1	0.999759	1.00127	-0.000845921	1.00151			-0.0127902
Paracetamol	PowerPicc ®	Polyurethane	10	1	1	1	0.999759	1.00308	-0.00186078	1.00332	1.00256	0.0017258	-0.0281348	-0.0216815	0.0146101
Paracetamol	PowerPicc ®	Polyurethane	10	1	2	1	0.999759	1.00485	-0.00285289	1.0051			-0.0431354
Paracetamol	PowerPicc ®	Polyurethane	10	1	3	1	0.999759	0.999024	0.000411757	0.999265			0.00622573
Paracetamol	PowerPicc ®	Polyurethane	10	2	1	1	0.999759	0.998165	0.000892701	0.998406	1.00054	0.00275396	0.0134975	-0.00455813	0.0233142
Paracetamol	PowerPicc ®	Polyurethane	10	2	2	1	0.999759	1.00576	-0.00336093	1.006			-0.0508169
Paracetamol	PowerPicc ®	Polyurethane	10	2	3	1	0.999759	0.996967	0.00156383	0.997207			0.023645
Paracetamol	PowerPicc ®	Polyurethane	10	4	1	1	0.999759	0.996865	0.00162063	0.997106	0.996849	0.00037746	0.0245038	0.0266765	0.00319546
Paracetamol	PowerPicc ®	Polyurethane	10	4	2	1	0.999759	0.997095	0.00149193	0.997335			0.0225578
Paracetamol	PowerPicc ®	Polyurethane	10	4	3	1	0.999759	0.995866	0.00218043	0.996106			0.0329678
Paracetamol	PowerPicc ®	Polyurethane	10	8	1	1	0.999759	1.00551	-0.00321972	1.00575	1.00463	0.000608921	-0.0486819	-0.0391542	0.00515493
Paracetamol	PowerPicc ®	Polyurethane	10	8	2	1	0.999759	1.00422	-0.00250013	1.00447			-0.0378017
Paracetamol	PowerPicc ®	Polyurethane	10	8	3	1	0.999759	1.00342	-0.00204889	1.00366			-0.030979
Paracetamol	Turbo-Flo ®	Polyurethane	0	0	1	1	1.00264	1.00462	-0.000853361	1.00197	1.00124	0.000951572	-0.0128656	-0.00805766	0.00620686
Paracetamol	Turbo-Flo ®	Polyurethane	0	0	2	1	1.00264	1.00504	-0.00103242	1.00239			-0.0155652
Paracetamol	Turbo-Flo ®	Polyurethane	0	0	3	1	1.00264	1.00199	0.000282416	0.999347			0.00425783
Paracetamol	Turbo-Flo ®	Polyurethane	0	24	1	1	1.00264	0.821242	0.0782754	0.819077	0.827656	0.0049622	1.18011	1.12416	0.0323672
Paracetamol	Turbo-Flo ®	Polyurethane	0	24	2	1	1.00264	0.838477	0.0708384	0.836267			1.06799
Paracetamol	Turbo-Flo ®	Polyurethane	0	24	3	1	1.00264	0.82981	0.0745783	0.827623			1.12437
Paracetamol	Turbo-Flo ®	Polyurethane	0	96	1	1	1.00264	0.772007	0.0995207	0.769972	0.757244	0.00697796	1.50042	1.58344	0.0455154
Paracetamol	Turbo-Flo ®	Polyurethane	0	96	2	1	1.00264	0.757835	0.105636	0.755837			1.59261
Paracetamol	Turbo-Flo ®	Polyurethane	0	96	3	1	1.00264	0.747894	0.109926	0.745922			1.65728
Paracetamol	Turbo-Flo ®	Polyurethane	1	0	1	1	0.999422	0.997322	0.00090591	0.997899	0.99931	0.00107446	0.0137019	0.00450297	0.00700843
Paracetamol	Turbo-Flo ®	Polyurethane	1	0	2	1	0.999422	0.998033	0.000599181	0.998611			0.00906262
Paracetamol	Turbo-Flo ®	Polyurethane	1	0	3	1	0.999422	1.00084	-0.00061194	1.00142			-0.00925559
Paracetamol	Turbo-Flo ®	Polyurethane	1	1	1	1	0.999422	0.967455	0.0137937	0.968015	0.969637	0.000835674	0.20863	0.198049	0.00545089
Paracetamol	Turbo-Flo ®	Polyurethane	1	1	2	1	0.999422	0.970235	0.0125941	0.970797			0.190486
Paracetamol	Turbo-Flo ®	Polyurethane	1	1	3	1	0.999422	0.969539	0.0128945	0.9701			0.19503
Paracetamol	Turbo-Flo ®	Polyurethane	1	2	1	1	0.999422	0.980756	0.00805447	0.981323	0.983119	0.00150628	0.121824	0.110108	0.00982507
Paracetamol	Turbo-Flo ®	Polyurethane	1	2	2	1	0.999422	0.985542	0.00598927	0.986112			0.0905878
Paracetamol	Turbo-Flo ®	Polyurethane	1	2	3	1	0.999422	0.981355	0.00779578	0.981923			0.117911
Paracetamol	Turbo-Flo ®	Polyurethane	1	4	1	1	0.999422	0.995896	0.00152124	0.996473	0.996097	0.000976002	0.0230088	0.0254566	0.00636621
Paracetamol	Turbo-Flo ®	Polyurethane	1	4	2	1	0.999422	0.993676	0.00247943	0.994251			0.0375014
Paracetamol	Turbo-Flo ®	Polyurethane	1	4	3	1	0.999422	0.996992	0.00104857	0.997569			0.0158596
Paracetamol	Turbo-Flo ®	Polyurethane	1	8	1	1	0.999422	1.00018	-0.0003293	1.00076	0.998982	0.000958273	-0.00498066	0.00663841	0.00625057
Paracetamol	Turbo-Flo ®	Polyurethane	1	8	2	1	0.999422	0.998127	0.0005589	0.998704			0.00845337
Paracetamol	Turbo-Flo ®	Polyurethane	1	8	3	1	0.999422	0.996902	0.00108711	0.997479			0.0164425
Paracetamol	Turbo-Flo ®	Polyurethane	10	0	1	1	0.999422	1.00265	-0.00139455	1.00323	1.00343	0.000368014	-0.0210926	-0.0223577	0.00240046
Paracetamol	Turbo-Flo ®	Polyurethane	10	0	2	1	0.999422	1.00356	-0.00178519	1.00414			-0.027001
Paracetamol	Turbo-Flo ®	Polyurethane	10	0	3	1	0.999422	1.00233	-0.00125484	1.00291			-0.0189794
Paracetamol	Turbo-Flo ®	Polyurethane	10	1	1	1	0.999422	0.999294	5.50469e-05	0.999872	1.00062	0.000972761	0.000832585	-0.00403068	0.00634507
Paracetamol	Turbo-Flo ®	Polyurethane	10	1	2	1	0.999422	1.00197	-0.0010984	1.00255			-0.0166132
Paracetamol	Turbo-Flo ®	Polyurethane	10	1	3	1	0.999422	0.998857	0.000243875	0.999435			0.00368861
Paracetamol	Turbo-Flo ®	Polyurethane	10	2	1	1	0.999422	0.996715	0.00116781	0.997292	0.999785	0.00165246	0.0176631	0.00140069	0.0107786
Paracetamol	Turbo-Flo ®	Polyurethane	10	2	2	1	0.999422	1.00233	-0.00125524	1.00291			-0.0189855
Paracetamol	Turbo-Flo ®	Polyurethane	10	2	3	1	0.999422	0.998575	0.000365254	0.999153			0.00552448
Paracetamol	Turbo-Flo ®	Polyurethane	10	4	1	1	0.999422	1.00468	-0.0022699	1.00526	1.00502	0.000579945	-0.0343323	-0.0327346	0.00378283
Paracetamol	Turbo-Flo ®	Polyurethane	10	4	2	1	0.999422	1.00333	-0.00168803	1.00391			-0.0255315
Paracetamol	Turbo-Flo ®	Polyurethane	10	4	3	1	0.999422	1.0053	-0.00253488	1.00588			-0.0383401
Paracetamol	Turbo-Flo ®	Polyurethane	10	8	1	1	0.999422	1.00234	-0.00125818	1.00292	1.00208	0.000947942	-0.01903	-0.0135636	0.00618318
Paracetamol	Turbo-Flo ®	Polyurethane	10	8	2	1	0.999422	0.999609	-8.09198e-05	1.00019			-0.00122391
Paracetamol	Turbo-Flo ®	Polyurethane	10	8	3	1	0.999422	1.00255	-0.00135119	1.00313			-0.0204368
Paracetamol	Lifecath ®	Silicone	0	0	1	1	0.997287	0.996145	0.000632846	0.998855	1.00012	0.000633416	0.0095923	-0.000994223	0.00530586
Paracetamol	Lifecath ®	Silicone	0	0	2	1	0.997287	0.99796	-0.000373051	1.00068			-0.00565448
Paracetamol	Lifecath ®	Silicone	0	0	3	1	0.997287	0.998111	-0.000456575	1.00083			-0.00692049
Paracetamol	Lifecath ®	Silicone	0	24	1	1	0.997287	0.909155	0.0488379	0.911628	0.910412	0.000842822	0.740255	0.750442	0.00705996
Paracetamol	Lifecath ®	Silicone	0	24	2	1	0.997287	0.906327	0.0504046	0.908793			0.764003
Paracetamol	Lifecath ®	Silicone	0	24	3	1	0.997287	0.908343	0.0492874	0.910815			0.747067
Paracetamol	Lifecath ®	Silicone	0	96	1	1	0.997287	0.922909	0.0412158	0.92542	1.00293	0.0418429	0.624723	-0.0245336	0.350501
Paracetamol	Lifecath ®	Silicone	0	96	2	1	0.997287	1.0116	-0.00793334	1.01436			-0.120249
Paracetamol	Lifecath ®	Silicone	0	96	3	1	0.997287	1.06611	-0.0381382	1.06901			-0.578075
Paracetamol	Lifecath ®	Silicone	1	0	1	1	0.994466	0.996993	-0.00140043	1.00254	1.00196	0.000288373	-0.0212871	-0.0164569	0.00241558
Paracetamol	Lifecath ®	Silicone	1	0	2	1	0.994466	0.996143	-0.000929191	1.00169			-0.0141241
Paracetamol	Lifecath ®	Silicone	1	0	3	1	0.994466	0.996123	-0.000918363	1.00167			-0.0139595
Paracetamol	Lifecath ®	Silicone	1	1	1	1	0.994466	0.997809	-0.00185277	1.00336	1.00065	0.00140851	-0.0281628	-0.00546676	0.0117985
Paracetamol	Lifecath ®	Silicone	1	1	2	1	0.994466	0.993104	0.000754867	0.99863			0.0114743
Paracetamol	Lifecath ®	Silicone	1	1	3	1	0.994466	0.994432	1.89619e-05	0.999966			0.000288228
Paracetamol	Lifecath ®	Silicone	1	2	1	1	0.994466	0.995399	-0.00051707	1.00094	1.00283	0.00102119	-0.00785966	-0.0236791	0.00855407
Paracetamol	Lifecath ®	Silicone	1	2	2	1	0.994466	0.998886	-0.00244929	1.00444			-0.0372302
Paracetamol	Lifecath ®	Silicone	1	2	3	1	0.994466	0.997546	-0.00170703	1.0031			-0.0259475
Paracetamol	Lifecath ®	Silicone	1	4	1	1	0.994466	0.993883	0.000322811	0.999414	1.0033	0.00196022	0.00490685	-0.0276638	0.0164199
Paracetamol	Lifecath ®	Silicone	1	4	2	1	0.994466	0.999252	-0.00265226	1.00481			-0.0403154
Paracetamol	Lifecath ®	Silicone	1	4	3	1	0.994466	1.00011	-0.00313038	1.00568			-0.0475829
Paracetamol	Lifecath ®	Silicone	1	8	1	1	0.994466	0.991066	0.00188416	0.996581	0.999882	0.00167774	0.02864	0.000990948	0.0140537
Paracetamol	Lifecath ®	Silicone	1	8	2	1	0.994466	0.996509	-0.00113233	1.00205			-0.0172118
Paracetamol	Lifecath ®	Silicone	1	8	3	1	0.994466	0.99547	-0.000556254	1.00101			-0.00845527
Paracetamol	Lifecath ®	Silicone	10	0	1	1	0.99931	1.00452	-0.00288863	1.00522	1.00509	0.000838206	-0.0436953	-0.0426104	0.00702129
Paracetamol	Lifecath ®	Silicone	10	0	2	1	0.99931	1.00578	-0.0035826	1.00647			-0.0541928
Paracetamol	Lifecath ®	Silicone	10	0	3	1	0.99931	1.00288	-0.00197949	1.00357			-0.0299431
Paracetamol	Lifecath ®	Silicone	10	1	1	1	0.99931	1.00271	-0.0018817	1.0034	1.00703	0.00182964	-0.0284638	-0.0589043	0.0153261
Paracetamol	Lifecath ®	Silicone	10	1	2	1	0.99931	1.00778	-0.00469436	1.00848			-0.0710101
Paracetamol	Lifecath ®	Silicone	10	1	3	1	0.99931	1.00852	-0.00510614	1.00922			-0.077239
Paracetamol	Lifecath ®	Silicone	10	2	1	1	0.99931	1.00522	-0.00327256	1.00591	1.00804	0.00108597	-0.049503	-0.0673524	0.00909669
Paracetamol	Lifecath ®	Silicone	10	2	2	1	0.99931	1.00805	-0.00484096	1.00874			-0.0732277
Paracetamol	Lifecath ®	Silicone	10	2	3	1	0.99931	1.00877	-0.00524414	1.00947			-0.0793265
Paracetamol	Lifecath ®	Silicone	10	4	1	1	0.99931	1.01338	-0.00779678	1.01408	1.01453	0.000327774	-0.117939	-0.121697	0.00274562
Paracetamol	Lifecath ®	Silicone	10	4	2	1	0.99931	1.01364	-0.00794011	1.01434			-0.120108
Paracetamol	Lifecath ®	Silicone	10	4	3	1	0.99931	1.01447	-0.00839863	1.01517			-0.127044
Paracetamol	Lifecath ®	Silicone	10	8	1	1	0.99931	1.00894	-0.00533368	1.00963	1.00814	0.00110711	-0.0806809	-0.068167	0.0092738
Paracetamol	Lifecath ®	Silicone	10	8	2	1	0.99931	1.00811	-0.00487653	1.00881			-0.0737658
Paracetamol	Lifecath ®	Silicone	10	8	3	1	0.99931	1.00528	-0.003309	1.00598			-0.0500542

## Sheet: Catheter - diazepam
Drug	Reference	Material	Flowrate (mL/h)	Time (hour)	Replicate number	Theoretical concentration (mg/mL)	Initial Concentration (mg/mL)	Concentration at analytical time (mg/mL)	Sorption (mmol/L/dm²)	Remaining percentage	Mean remaining percentage	Standard error of the mean - Remaining percentage	sorption/cm²	Mean sorption/cm²	Standard error of the mean - sorption/cm²
Diazépam	Blue FlexTip ®	Polyurethane	0	0	1	0.2	0.196413	0.183173	0.00573682	0.93259	0.914755	0.0115725	0.831676	1.05172	0.142777
Diazépam	Blue FlexTip ®	Polyurethane	0	0	2	0.2	0.196413	0.175409	0.00910076	0.893062			1.31935
Diazépam	Blue FlexTip ®	Polyurethane	0	0	3	0.2	0.196413	0.180427	0.00692636	0.918613			1.00412
Diazépam	Blue FlexTip ®	Polyurethane	0	24	1	0.2	0.196413	0.00278947	0.0838949	0.0142021	0.0152213	0.00306564	12.1624	12.1498	0.0378227
Diazépam	Blue FlexTip ®	Polyurethane	0	24	2	0.2	0.196413	0.00206134	0.0842104	0.0104949			12.2081
Diazépam	Blue FlexTip ®	Polyurethane	0	24	3	0.2	0.196413	0.00411817	0.0833192	0.0209669			12.0789
Diazépam	Blue FlexTip ®	Polyurethane	0	96	1	0.2	0.196413	0.001	0.0846703	0.00509131	0.00509131	0	12.2748	12.2748	1.25607e-15
Diazépam	Blue FlexTip ®	Polyurethane	0	96	2	0.2	0.196413	0.001	0.0846703	0.00509131			12.2748
Diazépam	Blue FlexTip ®	Polyurethane	0	96	3	0.2	0.196413	0.001	0.0846703	0.00509131			12.2748
Diazépam	Blue FlexTip ®	Polyurethane	1	0	1	0.2	0.195691	0.0732036	0.0530726	0.374077	0.395044	0.0134656	7.72239	7.46371	0.166133
Diazépam	Blue FlexTip ®	Polyurethane	1	0	2	0.2	0.195691	0.0764936	0.051647	0.390889			7.51496
Diazépam	Blue FlexTip ®	Polyurethane	1	0	3	0.2	0.195691	0.0822226	0.0491647	0.420165			7.15377
Diazépam	Blue FlexTip ®	Polyurethane	1	1	1	0.2	0.195691	0.0347973	0.0697136	0.177817	0.206038	0.0152882	10.1438	9.79558	0.188619
Diazépam	Blue FlexTip ®	Polyurethane	1	1	2	0.2	0.195691	0.0450756	0.0652601	0.23034			9.49575
Diazépam	Blue FlexTip ®	Polyurethane	1	1	3	0.2	0.195691	0.0410868	0.0669884	0.209957			9.74723
Diazépam	Blue FlexTip ®	Polyurethane	1	2	1	0.2	0.195691	0.0448999	0.0653362	0.229442	0.251563	0.0120388	9.50683	9.23392	0.14853
Diazépam	Blue FlexTip ®	Polyurethane	1	2	2	0.2	0.195691	0.0530046	0.0618245	0.270858			8.99585
Diazépam	Blue FlexTip ®	Polyurethane	1	2	3	0.2	0.195691	0.0497813	0.0632212	0.254387			9.19907
Diazépam	Blue FlexTip ®	Polyurethane	1	4	1	0.2	0.195691	0.0500645	0.0630985	0.255834	0.280091	0.0124671	9.18122	8.88195	0.153814
Diazépam	Blue FlexTip ®	Polyurethane	1	4	2	0.2	0.195691	0.0581631	0.0595894	0.297219			8.67063
Diazépam	Blue FlexTip ®	Polyurethane	1	4	3	0.2	0.195691	0.0562063	0.0604373	0.287219			8.794
Diazépam	Blue FlexTip ®	Polyurethane	1	8	1	0.2	0.195691	0.0501588	0.0630576	0.256316	0.282518	0.0131011	9.17527	8.852	0.161636
Diazépam	Blue FlexTip ®	Polyurethane	1	8	2	0.2	0.195691	0.057842	0.0597286	0.295578			8.69088
Diazépam	Blue FlexTip ®	Polyurethane	1	8	3	0.2	0.195691	0.0578582	0.0597215	0.29566			8.68986
Diazépam	Blue FlexTip ®	Polyurethane	10	0	1	0.2	0.195732	0.155061	0.0176223	0.79221	0.789897	0.0111312	2.56363	2.59217	0.137332
Diazépam	Blue FlexTip ®	Polyurethane	10	0	2	0.2	0.195732	0.158135	0.0162904	0.807915			2.36986
Diazépam	Blue FlexTip ®	Polyurethane	10	0	3	0.2	0.195732	0.150628	0.0195428	0.769565			2.84302
Diazépam	Blue FlexTip ®	Polyurethane	10	1	1	0.2	0.195732	0.164034	0.0137345	0.838053	0.842296	0.0134574	1.99803	1.94568	0.166032
Diazépam	Blue FlexTip ®	Polyurethane	10	1	2	0.2	0.195732	0.169785	0.0112426	0.867435			1.63553
Diazépam	Blue FlexTip ®	Polyurethane	10	1	3	0.2	0.195732	0.160774	0.0151468	0.8214			2.20349
Diazépam	Blue FlexTip ®	Polyurethane	10	2	1	0.2	0.195732	0.165209	0.0132254	0.844056	0.842009	0.00296536	1.92398	1.94923	0.0365854
Diazépam	Blue FlexTip ®	Polyurethane	10	2	2	0.2	0.195732	0.165551	0.0130769	0.845806			1.90238
Diazépam	Blue FlexTip ®	Polyurethane	10	2	3	0.2	0.195732	0.163664	0.0138946	0.836165			2.02133
Diazépam	Blue FlexTip ®	Polyurethane	10	4	1	0.2	0.195732	0.154576	0.0178325	0.789732	0.798003	0.00509865	2.5942	2.49215	0.062905
Diazépam	Blue FlexTip ®	Polyurethane	10	4	2	0.2	0.195732	0.158015	0.0163423	0.807304			2.37741
Diazépam	Blue FlexTip ®	Polyurethane	10	4	3	0.2	0.195732	0.155993	0.0172183	0.796974			2.50485
Diazépam	Blue FlexTip ®	Polyurethane	10	8	1	0.2	0.195732	0.157829	0.016423	0.806352	0.810673	0.00241247	2.38915	2.33584	0.0297641
Diazépam	Blue FlexTip ®	Polyurethane	10	8	2	0.2	0.195732	0.158734	0.0160309	0.810975			2.33211
Diazépam	Blue FlexTip ®	Polyurethane	10	8	3	0.2	0.195732	0.159461	0.0157156	0.814693			2.28625
Diazépam	PowerPicc ®	Polyurethane	0	0	1	0.2	0.196413	0.191649	0.0014165	0.975743	0.9739	0.00377312	0.205352	0.220957	0.0319421
Diazépam	PowerPicc ®	Polyurethane	0	0	2	0.2	0.196413	0.189861	0.00194803	0.966641			0.282409
Diazépam	PowerPicc ®	Polyurethane	0	0	3	0.2	0.196413	0.19235	0.0012079	0.979315			0.17511
Diazépam	PowerPicc ®	Polyurethane	0	24	1	0.2	0.196413	0.00121679	0.0580338	0.00619506	0.00545923	0.000367916	8.41324	8.41947	0.00311466
Diazépam	PowerPicc ®	Polyurethane	0	24	2	0.2	0.196413	0.001	0.0580982	0.00509131			8.42259
Diazépam	PowerPicc ®	Polyurethane	0	24	3	0.2	0.196413	0.001	0.0580982	0.00509131			8.42259
Diazépam	PowerPicc ®	Polyurethane	0	96	1	0.2	0.196413	0.001	0.0580982	0.00509131	0.00509131	0	8.42259	8.42259	0
Diazépam	PowerPicc ®	Polyurethane	0	96	2	0.2	0.196413	0.001	0.0580982	0.00509131			8.42259
Diazépam	PowerPicc ®	Polyurethane	0	96	3	0.2	0.196413	0.001	0.0580982	0.00509131			8.42259
Diazépam	PowerPicc ®	Polyurethane	1	0	1	0.2	0.204129	0.186348	0.00528647	0.912893	0.883417	0.0147381	0.737418	0.986954	0.124769
Diazépam	PowerPicc ®	Polyurethane	1	0	2	0.2	0.204129	0.177305	0.0079751	0.868592			1.11246
Diazépam	PowerPicc ®	Polyurethane	1	0	3	0.2	0.204129	0.177341	0.00796453	0.868766			1.11098
Diazépam	PowerPicc ®	Polyurethane	1	1	1	0.2	0.204129	0.076158	0.0380472	0.373087	0.339441	0.020207	5.30725	5.59208	0.171066
Diazépam	PowerPicc ®	Polyurethane	1	1	2	0.2	0.204129	0.069814	0.0399333	0.342008			5.57035
Diazépam	PowerPicc ®	Polyurethane	1	1	3	0.2	0.204129	0.061898	0.0422868	0.303229			5.89864
Diazépam	PowerPicc ®	Polyurethane	1	2	1	0.2	0.204129	0.0839645	0.0357262	0.41133	0.403656	0.00797984	4.9835	5.04846	0.0675549
Diazépam	PowerPicc ®	Polyurethane	1	2	2	0.2	0.204129	0.0840888	0.0356892	0.411939			4.97834
Diazépam	PowerPicc ®	Polyurethane	1	2	3	0.2	0.204129	0.0791411	0.0371602	0.387701			5.18354
Diazépam	PowerPicc ®	Polyurethane	1	4	1	0.2	0.204129	0.0892151	0.0341651	0.437052	0.439872	0.00633362	4.76575	4.74187	0.0536185
Diazépam	PowerPicc ®	Polyurethane	1	4	2	0.2	0.204129	0.0922618	0.0332593	0.451977			4.63939
Diazépam	PowerPicc ®	Polyurethane	1	4	3	0.2	0.204129	0.0878955	0.0345575	0.430587			4.82047
Diazépam	PowerPicc ®	Polyurethane	1	8	1	0.2	0.204129	0.0842159	0.0356514	0.412561	0.420003	0.00467893	4.97307	4.91008	0.0396103
Diazépam	PowerPicc ®	Polyurethane	1	8	2	0.2	0.204129	0.0854913	0.0352723	0.418809			4.92018
Diazépam	PowerPicc ®	Polyurethane	1	8	3	0.2	0.204129	0.0874975	0.0346758	0.428637			4.83698
Diazépam	PowerPicc ®	Polyurethane	10	0	1	0.2	0.195138	0.17428	0.00620137	0.89311	0.915211	0.0142494	0.904896	0.717793	0.120631
Diazépam	PowerPicc ®	Polyurethane	10	0	2	0.2	0.195138	0.177708	0.00518199	0.910681			0.75615
Diazépam	PowerPicc ®	Polyurethane	10	0	3	0.2	0.195138	0.18379	0.00337402	0.941844			0.492333
Diazépam	PowerPicc ®	Polyurethane	10	1	1	0.2	0.195138	0.174038	0.00627314	0.891873	0.896929	0.00380088	0.915369	0.872569	0.0321771
Diazépam	PowerPicc ®	Polyurethane	10	1	2	0.2	0.195138	0.174559	0.0061184	0.89454			0.892789
Diazépam	PowerPicc ®	Polyurethane	10	1	3	0.2	0.195138	0.176478	0.00554794	0.904373			0.809549
Diazépam	PowerPicc ®	Polyurethane	10	2	1	0.2	0.195138	0.176412	0.00556756	0.904035	0.909347	0.0031844	0.812412	0.767441	0.0269581
Diazépam	PowerPicc ®	Polyurethane	10	2	2	0.2	0.195138	0.177373	0.00528179	0.90896			0.770713
Diazépam	PowerPicc ®	Polyurethane	10	2	3	0.2	0.195138	0.17856	0.00492876	0.915046			0.719198
Diazépam	PowerPicc ®	Polyurethane	10	4	1	0.2	0.195138	0.157343	0.0112369	0.806315	0.843242	0.0228505	1.63968	1.32707	0.193445
Diazépam	PowerPicc ®	Polyurethane	10	4	2	0.2	0.195138	0.172702	0.00667054	0.885023			0.973357
Diazépam	PowerPicc ®	Polyurethane	10	4	3	0.2	0.195138	0.163601	0.00937623	0.838387			1.36817
Diazépam	PowerPicc ®	Polyurethane	10	8	1	0.2	0.195138	0.170762	0.00724721	0.875084	0.863611	0.00957116	1.0575	1.15462	0.0810265
Diazépam	PowerPicc ®	Polyurethane	10	8	2	0.2	0.195138	0.169994	0.00747565	0.871146			1.09084
Diazépam	PowerPicc ®	Polyurethane	10	8	3	0.2	0.195138	0.164814	0.0090155	0.844605			1.31553
Diazépam	Turbo-Flo ®	Polyurethane	0	0	1	0.2	0.198187	0.187785	0.00238279	0.947515	0.947162	0.00368235	0.342346	0.344652	0.024019
Diazépam	Turbo-Flo ®	Polyurethane	0	0	2	0.2	0.198187	0.188942	0.00211764	0.953355			0.304251
Diazépam	Turbo-Flo ®	Polyurethane	0	0	3	0.2	0.198187	0.186417	0.00269609	0.940614			0.387359
Diazépam	Turbo-Flo ®	Polyurethane	0	24	1	0.2	0.198187	0.001	0.0451705	0.00504575	0.00504575	0	6.48983	6.48983	0
Diazépam	Turbo-Flo ®	Polyurethane	0	24	2	0.2	0.198187	0.001	0.0451705	0.00504575			6.48983
Diazépam	Turbo-Flo ®	Polyurethane	0	24	3	0.2	0.198187	0.001	0.0451705	0.00504575			6.48983
Diazépam	Turbo-Flo ®	Polyurethane	0	96	1	0.2	0.198187	0.001	0.0451705	0.00504575	0.00504575	0	6.48983	6.48983	0
Diazépam	Turbo-Flo ®	Polyurethane	0	96	2	0.2	0.198187	0.001	0.0451705	0.00504575			6.48983
Diazépam	Turbo-Flo ®	Polyurethane	0	96	3	0.2	0.198187	0.001	0.0451705	0.00504575			6.48983
Diazépam	Turbo-Flo ®	Polyurethane	1	0	1	0.2	0.197457	0.0692339	0.0293728	0.350627	0.355062	0.00541504	4.23569	4.20677	0.0353209
Diazépam	Turbo-Flo ®	Polyurethane	1	0	2	0.2	0.197457	0.072237	0.0286848	0.365836			4.13649
Diazépam	Turbo-Flo ®	Polyurethane	1	0	3	0.2	0.197457	0.0688578	0.0294589	0.348722			4.24812
Diazépam	Turbo-Flo ®	Polyurethane	1	1	1	0.2	0.197457	0.011089	0.0426923	0.0561588	0.0604295	0.00232318	6.15643	6.12858	0.0151535
Diazépam	Turbo-Flo ®	Polyurethane	1	1	2	0.2	0.197457	0.0126669	0.0423308	0.0641499			6.10431
Diazépam	Turbo-Flo ®	Polyurethane	1	1	3	0.2	0.197457	0.0120409	0.0424742	0.0609799			6.12499
Diazépam	Turbo-Flo ®	Polyurethane	1	2	1	0.2	0.197457	0.0102764	0.0428784	0.0520437	0.0553959	0.00218241	6.18328	6.16141	0.0142353
Diazépam	Turbo-Flo ®	Polyurethane	1	2	2	0.2	0.197457	0.0117473	0.0425415	0.0594929			6.13469
Diazépam	Turbo-Flo ®	Polyurethane	1	2	3	0.2	0.197457	0.0107913	0.0427605	0.0546512			6.16627
Diazépam	Turbo-Flo ®	Polyurethane	1	4	1	0.2	0.197457	0.0123593	0.0424013	0.0625925	0.0611679	0.000727379	6.11447	6.12376	0.0047445
Diazépam	Turbo-Flo ®	Polyurethane	1	4	2	0.2	0.197457	0.0119878	0.0424864	0.0607108			6.12674
Diazépam	Turbo-Flo ®	Polyurethane	1	4	3	0.2	0.197457	0.011887	0.0425095	0.0602004			6.13007
Diazépam	Turbo-Flo ®	Polyurethane	1	8	1	0.2	0.197457	0.0153184	0.0417234	0.0775783	0.079159	0.000852731	6.01672	6.00641	0.00556215
Diazépam	Turbo-Flo ®	Polyurethane	1	8	2	0.2	0.197457	0.0158961	0.0415911	0.0805039			5.99764
Diazépam	Turbo-Flo ®	Polyurethane	1	8	3	0.2	0.197457	0.0156771	0.0416413	0.0793948			6.00487
Diazépam	Turbo-Flo ®	Polyurethane	10	0	1	0.2	0.197457	0.131776	0.0150458	0.667367	0.665997	0.00566373	2.16968	2.17862	0.036943
Diazépam	Turbo-Flo ®	Polyurethane	10	0	2	0.2	0.197457	0.133294	0.0146983	0.67505			2.11957
Diazépam	Turbo-Flo ®	Polyurethane	10	0	3	0.2	0.197457	0.129448	0.0155792	0.655574			2.2466
Diazépam	Turbo-Flo ®	Polyurethane	10	1	1	0.2	0.197457	0.131085	0.0152043	0.663863	0.667358	0.00557328	2.19254	2.16974	0.0363531
Diazépam	Turbo-Flo ®	Polyurethane	10	1	2	0.2	0.197457	0.13393	0.0145526	0.678271			2.09855
Diazépam	Turbo-Flo ®	Polyurethane	10	1	3	0.2	0.197457	0.13031	0.0153818	0.659938			2.21813
Diazépam	Turbo-Flo ®	Polyurethane	10	2	1	0.2	0.197457	0.136795	0.0138962	0.692782	0.691093	0.0018959	2.0039	2.01492	0.0123665
Diazépam	Turbo-Flo ®	Polyurethane	10	2	2	0.2	0.197457	0.135714	0.0141438	0.687309			2.0396
Diazépam	Turbo-Flo ®	Polyurethane	10	2	3	0.2	0.197457	0.136875	0.0138778	0.693189			2.00125
Diazépam	Turbo-Flo ®	Polyurethane	10	4	1	0.2	0.197457	0.134074	0.0145195	0.679003	0.677235	0.00116066	2.09378	2.10531	0.00757069
Diazépam	Turbo-Flo ®	Polyurethane	10	4	2	0.2	0.197457	0.133808	0.0145806	0.677653			2.10259
Diazépam	Turbo-Flo ®	Polyurethane	10	4	3	0.2	0.197457	0.133293	0.0146984	0.675048			2.11958
Diazépam	Turbo-Flo ®	Polyurethane	10	8	1	0.2	0.197457	0.140008	0.0131602	0.709055	0.710357	0.00470258	1.89776	1.88926	0.0306737
Diazépam	Turbo-Flo ®	Polyurethane	10	8	2	0.2	0.197457	0.141987	0.0127069	0.719075			1.8324
Diazépam	Turbo-Flo ®	Polyurethane	10	8	3	0.2	0.197457	0.138801	0.0134367	0.702942			1.93763
Diazépam	Lifecath ®	Silicone	0	0	1	0.2	0.204445	0.173578	0.00908058	0.849019	0.835883	0.00664328	1.26471	1.37474	0.0556479
Diazépam	Lifecath ®	Silicone	0	0	2	0.2	0.204445	0.169196	0.0103697	0.827585			1.44425
Diazépam	Lifecath ®	Silicone	0	0	3	0.2	0.204445	0.169903	0.0101615	0.831046			1.41526
Diazépam	Lifecath ®	Silicone	0	24	1	0.2	0.204445	0.001	0.0598495	0.00489129	0.00489129	0	8.3356	8.3356	0
Diazépam	Lifecath ®	Silicone	0	24	2	0.2	0.204445	0.001	0.0598495	0.00489129			8.3356
Diazépam	Lifecath ®	Silicone	0	24	3	0.2	0.204445	0.001	0.0598495	0.00489129			8.3356
Diazépam	Lifecath ®	Silicone	0	96	1	0.2	0.204445	0.001	0.0598495	0.00489129	0.00489129	0	8.3356	8.3356	0
Diazépam	Lifecath ®	Silicone	0	96	2	0.2	0.204445	0.001	0.0598495	0.00489129			8.3356
Diazépam	Lifecath ®	Silicone	0	96	3	0.2	0.204445	0.001	0.0598495	0.00489129			8.3356
Diazépam	Lifecath ®	Silicone	1	0	1	0.2	0.194024	0.0222983	0.0505182	0.114926	0.130914	0.0102101	7.41389	7.27996	0.0855254
Diazépam	Lifecath ®	Silicone	1	0	2	0.2	0.194024	0.0248171	0.0497772	0.127908			7.30515
Diazépam	Lifecath ®	Silicone	1	0	3	0.2	0.194024	0.0290859	0.0485214	0.149909			7.12085
Diazépam	Lifecath ®	Silicone	1	1	1	0.2	0.194024	0.001	0.0567837	0.00515401	0.00541131	0.000234084	8.3334	8.33125	0.00196083
Diazépam	Lifecath ®	Silicone	1	1	2	0.2	0.194024	0.00100916	0.056781	0.00520124			8.33301
Diazépam	Lifecath ®	Silicone	1	1	3	0.2	0.194024	0.0011406	0.0567423	0.00587869			8.32733
Diazépam	Lifecath ®	Silicone	1	2	1	0.2	0.194024	0.001	0.0567837	0.00515401	0.00515401	0	8.3334	8.3334	0
Diazépam	Lifecath ®	Silicone	1	2	2	0.2	0.194024	0.001	0.0567837	0.00515401			8.3334
Diazépam	Lifecath ®	Silicone	1	2	3	0.2	0.194024	0.001	0.0567837	0.00515401			8.3334
Diazépam	Lifecath ®	Silicone	1	4	1	0.2	0.194024	0.001	0.0567837	0.00515401	0.00515401	0	8.3334	8.3334	0
Diazépam	Lifecath ®	Silicone	1	4	2	0.2	0.194024	0.001	0.0567837	0.00515401			8.3334
Diazépam	Lifecath ®	Silicone	1	4	3	0.2	0.194024	0.001	0.0567837	0.00515401			8.3334
Diazépam	Lifecath ®	Silicone	1	8	1	0.2	0.194024	0.001	0.0567837	0.00515401	0.00515401	0	8.3334	8.3334	0
Diazépam	Lifecath ®	Silicone	1	8	2	0.2	0.194024	0.001	0.0567837	0.00515401			8.3334
Diazépam	Lifecath ®	Silicone	1	8	3	0.2	0.194024	0.001	0.0567837	0.00515401			8.3334
Diazépam	Lifecath ®	Silicone	10	0	1	0.2	0.200357	0.0665319	0.0393687	0.332067	0.353389	0.0109013	5.59499	5.41638	0.0913154
Diazépam	Lifecath ®	Silicone	10	0	2	0.2	0.200357	0.0737295	0.0372514	0.36799			5.29408
Diazépam	Lifecath ®	Silicone	10	0	3	0.2	0.200357	0.0721509	0.0377158	0.360111			5.36008
Diazépam	Lifecath ®	Silicone	10	1	1	0.2	0.200357	0.0876876	0.0331452	0.437656	0.432985	0.00416604	4.71052	4.74964	0.0348971
Diazépam	Lifecath ®	Silicone	10	1	2	0.2	0.200357	0.087481	0.0332059	0.436625			4.71915
Diazépam	Lifecath ®	Silicone	10	1	3	0.2	0.200357	0.0850866	0.0339103	0.424674			4.81926
Diazépam	Lifecath ®	Silicone	10	2	1	0.2	0.200357	0.10127	0.0291495	0.505447	0.504013	0.00104064	4.14266	4.15467	0.00871704
Diazépam	Lifecath ®	Silicone	10	2	2	0.2	0.200357	0.101101	0.0291993	0.504603			4.14973
Diazépam	Lifecath ®	Silicone	10	2	3	0.2	0.200357	0.100577	0.0293533	0.50199			4.17162
Diazépam	Lifecath ®	Silicone	10	4	1	0.2	0.200357	0.107359	0.0273582	0.535839	0.535975	0.0025709	3.88808	3.88694	0.0215353
Diazépam	Lifecath ®	Silicone	10	4	2	0.2	0.200357	0.108292	0.0270838	0.540494			3.84909
Diazépam	Lifecath ®	Silicone	10	4	3	0.2	0.200357	0.106508	0.0276085	0.531591			3.92366
Diazépam	Lifecath ®	Silicone	10	8	1	0.2	0.200357	0.132038	0.020098	0.659015	0.668017	0.0053307	2.85628	2.78088	0.044653
Diazépam	Lifecath ®	Silicone	10	8	2	0.2	0.200357	0.133752	0.0195938	0.667569			2.78463
Diazépam	Lifecath ®	Silicone	10	8	3	0.2	0.200357	0.135735	0.0190106	0.677465			2.70174

## Sheet: Catheter - insulin
Drug	Reference	Material	Flowrate (mL/h)	Time (hour)	Replicate number	Theoretical concentration (mg/mL)	Initial Concentration (mg/mL)	Concentration at analytical time (mg/mL)	Sorption (mmol/L/dm²)	Remaining percentage	Mean remaining percentage	Standard error of the mean - Remaining percentage	sorption/cm²	Mean sorption/cm²	Standard error of the mean - sorption/cm²
Insuline	Blue FlexTip ®	Polyurethane	0	0	1	0.0035	0.00367708	0.00327473	8.52072e-06	0.890579	0.951369	0.0317348	1.34999	0.599994	0.391532
Insuline	Blue FlexTip ®	Polyurethane	0	0	2	0.0035	0.00367708	0.0035519	2.65089e-06	0.965958			0.419996
Insuline	Blue FlexTip ®	Polyurethane	0	0	3	0.0035	0.00367708	0.00366813	1.89349e-07	0.997568			0.0299997
Insuline	Blue FlexTip ®	Polyurethane	0	24	1	0.0035	0.00367708	0.00169855	4.19003e-05	0.461929	0.506276	0.023056	6.63851	6.09137	0.284455
Insuline	Blue FlexTip ®	Polyurethane	0	24	2	0.0035	0.00367708	0.00198338	3.58682e-05	0.539391			5.6828
Insuline	Blue FlexTip ®	Polyurethane	0	24	3	0.0035	0.00367708	0.00190291	3.75723e-05	0.517507			5.9528
Insuline	Blue FlexTip ®	Polyurethane	0	96	1	0.0035	0.00367708	0.00292219	1.59865e-05	0.794706	0.886179	0.0472425	2.53283	1.40427	0.582858
Insuline	Blue FlexTip ®	Polyurethane	0	96	2	0.0035	0.00367708	0.00350209	3.70584e-06	0.952411			0.587137
Insuline	Blue FlexTip ®	Polyurethane	0	96	3	0.0035	0.00367708	0.00335137	6.89773e-06	0.911421			1.09285
Insuline	Blue FlexTip ®	Polyurethane	1	0	1	0.0035	0.00337904	0.00286599	1.0865e-05	0.848168	0.884078	0.0188637	1.87324	1.43019	0.232732
Insuline	Blue FlexTip ®	Polyurethane	1	0	2	0.0035	0.00337904	0.00308186	6.29361e-06	0.912051			1.08508
Insuline	Blue FlexTip ®	Polyurethane	1	0	3	0.0035	0.00337904	0.00301416	7.72726e-06	0.892017			1.33226
Insuline	Blue FlexTip ®	Polyurethane	1	1	1	0.0035	0.00337904	0.0014	4.19111e-05	0.414319	0.55424	0.0700768	7.2259	5.49961	0.864578
Insuline	Blue FlexTip ®	Polyurethane	1	1	2	0.0035	0.00337904	0.00213283	2.63917e-05	0.631193			4.55019
Insuline	Blue FlexTip ®	Polyurethane	1	1	3	0.0035	0.00337904	0.00208557	2.73925e-05	0.617207			4.72275
Insuline	Blue FlexTip ®	Polyurethane	1	2	1	0.0035	0.00337904	0.00255178	1.75193e-05	0.755179	0.781387	0.0131495	3.02051	2.69716	0.162234
Insuline	Blue FlexTip ®	Polyurethane	1	2	2	0.0035	0.00337904	0.00267823	1.48414e-05	0.792601			2.5588
Insuline	Blue FlexTip ®	Polyurethane	1	2	3	0.0035	0.00337904	0.002691	1.45709e-05	0.796381			2.51217
Insuline	Blue FlexTip ®	Polyurethane	1	4	1	0.0035	0.00337904	0.00237551	2.12522e-05	0.703014	0.684618	0.0220848	3.66409	3.89106	0.272474
Insuline	Blue FlexTip ®	Polyurethane	1	4	2	0.0035	0.00337904	0.00239978	2.07383e-05	0.710196			3.57548
Insuline	Blue FlexTip ®	Polyurethane	1	4	3	0.0035	0.00337904	0.00216476	2.57155e-05	0.640643			4.4336
Insuline	Blue FlexTip ®	Polyurethane	1	8	1	0.0035	0.00337904	0.00251474	1.83038e-05	0.744217	0.603347	0.0918328	3.15575	4.89375	1.133
Insuline	Blue FlexTip ®	Polyurethane	1	8	2	0.0035	0.00337904	0.0021456	2.61212e-05	0.634973			4.50355
Insuline	Blue FlexTip ®	Polyurethane	1	8	3	0.0035	0.00337904	0.00145586	4.07282e-05	0.43085			7.02194
Insuline	Blue FlexTip ®	Polyurethane	10	0	1	0.0035	0.00337904	0.00277658	1.27585e-05	0.821708	0.960057	0.0697513	2.1997	0.492795	0.860563
Insuline	Blue FlexTip ®	Polyurethane	10	0	2	0.0035	0.00337904	0.00353019	-3.20091e-06	1.04473			-0.551868
Insuline	Blue FlexTip ®	Polyurethane	10	0	3	0.0035	0.00337904	0.00342545	-9.82814e-07	1.01373			-0.169447
Insuline	Blue FlexTip ®	Polyurethane	10	1	1	0.0035	0.00337904	0.00299628	8.10596e-06	0.886724	0.86606	0.0133865	1.39755	1.65249	0.165157
Insuline	Blue FlexTip ®	Polyurethane	10	1	2	0.0035	0.00337904	0.00284172	1.1379e-05	0.840986			1.96185
Insuline	Blue FlexTip ®	Polyurethane	10	1	3	0.0035	0.00337904	0.00294135	9.2691e-06	0.87047			1.59809
Insuline	Blue FlexTip ®	Polyurethane	10	2	1	0.0035	0.00337904	0.00314317	4.99522e-06	0.930195	0.880046	0.0297076	0.861225	1.47994	0.36652
Insuline	Blue FlexTip ®	Polyurethane	10	2	2	0.0035	0.00337904	0.00298223	8.40351e-06	0.882566			1.44885
Insuline	Blue FlexTip ®	Polyurethane	10	2	3	0.0035	0.00337904	0.00279574	1.23528e-05	0.827378			2.12974
Insuline	Blue FlexTip ®	Polyurethane	10	4	1	0.0035	0.00337904	0.00349442	-2.44351e-06	1.03415	0.877778	0.130279	-0.421285	1.50792	1.60732
Insuline	Blue FlexTip ®	Polyurethane	10	4	2	0.0035	0.00337904	0.00331177	1.42463e-06	0.980092			0.24562
Insuline	Blue FlexTip ®	Polyurethane	10	4	3	0.0035	0.00337904	0.00209195	2.72573e-05	0.619097			4.69943
Insuline	Blue FlexTip ®	Polyurethane	10	8	1	0.0035	0.00337904	0.00321725	3.42632e-06	0.952119	0.967618	0.0224407	0.590732	0.399521	0.276864
Insuline	Blue FlexTip ®	Polyurethane	10	8	2	0.0035	0.00337904	0.00341906	-8.47564e-07	1.01184			-0.146128
Insuline	Blue FlexTip ®	Polyurethane	10	8	3	0.0035	0.00337904	0.00317254	4.37307e-06	0.938889			0.753961
Insuline	PowerPicc ®	Polyurethane	0	0	1	0.0035	0.00365408	0.00329133	5.27128e-06	0.900727	0.941858	0.0272384	0.840414	0.492214	0.230592
Insuline	PowerPicc ®	Polyurethane	0	0	2	0.0035	0.00365408	0.00340373	3.63793e-06	0.931488			0.580004
Insuline	PowerPicc ®	Polyurethane	0	0	3	0.0035	0.00365408	0.00362982	3.52656e-07	0.993359			0.0562249
Insuline	PowerPicc ®	Polyurethane	0	24	1	0.0035	0.00365408	0.0014	3.27549e-05	0.383133	0.383133	0	5.2222	5.2222	0
Insuline	PowerPicc ®	Polyurethane	0	24	2	0.0035	0.00365408	0.0014	3.27549e-05	0.383133			5.2222
Insuline	PowerPicc ®	Polyurethane	0	24	3	0.0035	0.00365408	0.0014	3.27549e-05	0.383133			5.2222
Insuline	PowerPicc ®	Polyurethane	0	96	1	0.0035	0.00365408	0.0019208	2.51871e-05	0.525657	0.488838	0.0197915	4.01564	4.32734	0.167549
Insuline	PowerPicc ®	Polyurethane	0	96	2	0.0035	0.00365408	0.00176497	2.74515e-05	0.483012			4.37666
Insuline	PowerPicc ®	Polyurethane	0	96	3	0.0035	0.00365408	0.001673	2.87879e-05	0.457844			4.58972
Insuline	PowerPicc ®	Polyurethane	1	0	1	0.0035	0.00339096	0.00305248	4.91862e-06	0.900181	0.834137	0.0612124	0.845038	1.40415	0.518205
Insuline	PowerPicc ®	Polyurethane	1	0	2	0.0035	0.00339096	0.00241383	1.4199e-05	0.711843			2.43945
Insuline	PowerPicc ®	Polyurethane	1	0	3	0.0035	0.00339096	0.00301927	5.40121e-06	0.890387			0.927948
Insuline	PowerPicc ®	Polyurethane	1	1	1	0.0035	0.00339096	0.0017969	2.31639e-05	0.529908	0.589674	0.122443	3.97965	3.47369	1.03657
Insuline	PowerPicc ®	Polyurethane	1	1	2	0.0035	0.00339096	0.0027983	8.61223e-06	0.825222			1.47961
Insuline	PowerPicc ®	Polyurethane	1	1	3	0.0035	0.00339096	0.00140349	2.88807e-05	0.413892			4.96181
Insuline	PowerPicc ®	Polyurethane	1	2	1	0.0035	0.00339096	0.00274593	9.37323e-06	0.809779	0.840666	0.0168511	1.61036	1.34887	0.142656
Insuline	PowerPicc ®	Polyurethane	1	2	2	0.0035	0.00339096	0.00286344	7.66563e-06	0.844433			1.31698
Insuline	PowerPicc ®	Polyurethane	1	2	3	0.0035	0.00339096	0.00294263	6.51486e-06	0.867787			1.11928
Insuline	PowerPicc ®	Polyurethane	1	4	1	0.0035	0.00339096	0.00205236	1.94518e-05	0.605243	0.723394	0.0903762	3.34189	2.34166	0.765097
Insuline	PowerPicc ®	Polyurethane	1	4	2	0.0035	0.00339096	0.00225161	1.65563e-05	0.664005			2.84443
Insuline	PowerPicc ®	Polyurethane	1	4	3	0.0035	0.00339096	0.00305503	4.8815e-06	0.900934			0.838661
Insuline	PowerPicc ®	Polyurethane	1	8	1	0.0035	0.00339096	0.00179434	2.32011e-05	0.529155	0.68083	0.0788344	3.98603	2.702	0.667387
Insuline	PowerPicc ®	Polyurethane	1	8	2	0.0035	0.00339096	0.00269228	1.01528e-05	0.793958			1.74429
Insuline	PowerPicc ®	Polyurethane	1	8	3	0.0035	0.00339096	0.00243938	1.38278e-05	0.719376			2.37567
Insuline	PowerPicc ®	Polyurethane	10	0	1	0.0035	0.00339096	0.0030512	4.93719e-06	0.899804	0.868163	0.0434339	0.848227	1.11609	0.367698
Insuline	PowerPicc ®	Polyurethane	10	0	2	0.0035	0.00339096	0.00312784	3.82353e-06	0.922405			0.656898
Insuline	PowerPicc ®	Polyurethane	10	0	3	0.0035	0.00339096	0.00265269	1.07282e-05	0.782281			1.84314
Insuline	PowerPicc ®	Polyurethane	10	1	1	0.0035	0.00339096	0.00324663	2.09738e-06	0.957436	0.980664	0.0241762	0.360337	0.163693	0.204668
Insuline	PowerPicc ®	Polyurethane	10	1	2	0.0035	0.00339096	0.00324024	2.19018e-06	0.955552			0.376281
Insuline	PowerPicc ®	Polyurethane	10	1	3	0.0035	0.00339096	0.00348931	-1.42919e-06	1.029			-0.245539
Insuline	PowerPicc ®	Polyurethane	10	2	1	0.0035	0.00339096	0.00339352	-3.71217e-08	1.00075	0.88775	0.0611887	-0.00637765	0.950269	0.518005
Insuline	PowerPicc ®	Polyurethane	10	2	2	0.0035	0.00339096	0.00295668	6.31069e-06	0.87193			1.0842
Insuline	PowerPicc ®	Polyurethane	10	2	3	0.0035	0.00339096	0.00268079	1.03198e-05	0.790568			1.77299
Insuline	PowerPicc ®	Polyurethane	10	4	1	0.0035	0.00339096	0.0036081	-3.15534e-06	1.06403	0.908217	0.147424	-0.5421	0.77701	1.24805
Insuline	PowerPicc ®	Polyurethane	10	4	2	0.0035	0.00339096	0.00355062	-2.32011e-06	1.04708			-0.398603
Insuline	PowerPicc ®	Polyurethane	10	4	3	0.0035	0.00339096	0.00208046	1.90434e-05	0.61353			3.27173
Insuline	PowerPicc ®	Polyurethane	10	8	1	0.0035	0.00339096	0.0033718	2.78413e-07	0.99435	0.966225	0.0251719	0.0478324	0.285931	0.213098
Insuline	PowerPicc ®	Polyurethane	10	8	2	0.0035	0.00339096	0.00310612	4.13907e-06	0.916001			0.711108
Insuline	PowerPicc ®	Polyurethane	10	8	3	0.0035	0.00339096	0.00335137	5.75386e-07	0.988323			0.0988535
Insuline	Turbo-Flo ®	Polyurethane	0	0	1	0.0035	0.00365408	0.0034676	2.08794e-06	0.948965	0.946169	0.0296996	0.332886	0.351126	0.193723
Insuline	Turbo-Flo ®	Polyurethane	0	0	2	0.0035	0.00365408	0.00326451	4.3618e-06	0.893386			0.695413
Insuline	Turbo-Flo ®	Polyurethane	0	0	3	0.0035	0.00365408	0.00364003	1.57311e-07	0.996155			0.0250805
Insuline	Turbo-Flo ®	Polyurethane	0	24	1	0.0035	0.00365408	0.0014	2.52374e-05	0.383133	0.383133	0	4.02367	4.02367	0
Insuline	Turbo-Flo ®	Polyurethane	0	24	2	0.0035	0.00365408	0.0014	2.52374e-05	0.383133			4.02367
Insuline	Turbo-Flo ®	Polyurethane	0	24	3	0.0035	0.00365408	0.0014	2.52374e-05	0.383133			4.02367
Insuline	Turbo-Flo ®	Polyurethane	0	96	1	0.0035	0.00365408	0.0014	2.52374e-05	0.383133	0.383133	0	4.02367	4.02367	0
Insuline	Turbo-Flo ®	Polyurethane	0	96	2	0.0035	0.00365408	0.0014	2.52374e-05	0.383133			4.02367
Insuline	Turbo-Flo ®	Polyurethane	0	96	3	0.0035	0.00365408	0.0014	2.52374e-05	0.383133			4.02367
Insuline	Turbo-Flo ®	Polyurethane	1	0	1	0.0035	0.00359192	0.00293752	7.32687e-06	0.817813	0.825992	0.00558118	1.18836	1.13501	0.0364046
Insuline	Turbo-Flo ®	Polyurethane	1	0	2	0.0035	0.00359192	0.00295796	7.09805e-06	0.823503			1.15125
Insuline	Turbo-Flo ®	Polyurethane	1	0	3	0.0035	0.00359192	0.00300522	6.56892e-06	0.83666			1.06542
Insuline	Turbo-Flo ®	Polyurethane	1	1	1	0.0035	0.00359192	0.0014	2.45414e-05	0.389763	0.389763	3.92523e-17	3.98042	3.98042	3.14018e-16
Insuline	Turbo-Flo ®	Polyurethane	1	1	2	0.0035	0.00359192	0.0014	2.45414e-05	0.389763			3.98042
Insuline	Turbo-Flo ®	Polyurethane	1	1	3	0.0035	0.00359192	0.0014	2.45414e-05	0.389763			3.98042
Insuline	Turbo-Flo ®	Polyurethane	1	2	1	0.0035	0.00359192	0.00182117	1.98259e-05	0.507017	0.536888	0.0220483	3.2156	3.02076	0.143815
Insuline	Turbo-Flo ®	Polyurethane	1	2	2	0.0035	0.00359192	0.0018812	1.91538e-05	0.523731			3.10658
Insuline	Turbo-Flo ®	Polyurethane	1	2	3	0.0035	0.00359192	0.00208301	1.68942e-05	0.579916			2.7401
Insuline	Turbo-Flo ®	Polyurethane	1	4	1	0.0035	0.00359192	0.00269484	1.00441e-05	0.750249	0.718837	0.0357637	1.62906	1.83395	0.233277
Insuline	Turbo-Flo ®	Polyurethane	1	4	2	0.0035	0.00359192	0.00272549	9.70083e-06	0.758783			1.57339
Insuline	Turbo-Flo ®	Polyurethane	1	4	3	0.0035	0.00359192	0.0023257	1.4177e-05	0.64748			2.2994
Insuline	Turbo-Flo ®	Polyurethane	1	8	1	0.0035	0.00359192	0.00240744	1.32618e-05	0.670238	0.712437	0.0298722	2.15095	1.8757	0.194849
Insuline	Turbo-Flo ®	Polyurethane	1	8	2	0.0035	0.00359192	0.00276636	9.2432e-06	0.770163			1.49917
Insuline	Turbo-Flo ®	Polyurethane	1	8	3	0.0035	0.00359192	0.00250324	1.21892e-05	0.696909			1.97699
Insuline	Turbo-Flo ®	Polyurethane	10	0	1	0.0035	0.00359192	0.00293241	7.38407e-06	0.816391	0.82457	0.0204309	1.19764	1.14429	0.133265
Insuline	Turbo-Flo ®	Polyurethane	10	0	2	0.0035	0.00359192	0.00285194	8.28503e-06	0.793988			1.34376
Insuline	Turbo-Flo ®	Polyurethane	10	0	3	0.0035	0.00359192	0.00310102	5.49634e-06	0.86333			0.891461
Insuline	Turbo-Flo ®	Polyurethane	10	1	1	0.0035	0.00359192	0.00297073	6.95504e-06	0.827059	0.827296	0.0100607	1.12805	1.1265	0.0656236
Insuline	Turbo-Flo ®	Polyurethane	10	1	2	0.0035	0.00359192	0.00290942	7.64149e-06	0.80999			1.23939
Insuline	Turbo-Flo ®	Polyurethane	10	1	3	0.0035	0.00359192	0.0030346	6.23999e-06	0.844839			1.01208
Insuline	Turbo-Flo ®	Polyurethane	10	2	1	0.0035	0.00359192	0.00329389	3.3369e-06	0.917026	0.897824	0.0121166	0.541217	0.66647	0.0790334
Insuline	Turbo-Flo ®	Polyurethane	10	2	2	0.0035	0.00359192	0.00314444	5.01011e-06	0.875421			0.812598
Insuline	Turbo-Flo ®	Polyurethane	10	2	3	0.0035	0.00359192	0.00323641	3.98044e-06	0.901024			0.645594
Insuline	Turbo-Flo ®	Polyurethane	10	4	1	0.0035	0.00359192	0.00330921	3.16528e-06	0.921293	0.735906	0.134694	0.513383	1.72262	0.878575
Insuline	Turbo-Flo ®	Polyurethane	10	4	2	0.0035	0.00359192	0.00170238	2.11559e-05	0.473946			3.43131
Insuline	Turbo-Flo ®	Polyurethane	10	4	3	0.0035	0.00359192	0.00291836	7.54138e-06	0.812479			1.22315
Insuline	Turbo-Flo ®	Polyurethane	10	8	1	0.0035	0.00359192	0.00354935	4.76699e-07	0.988147	0.967285	0.0149259	0.0773167	0.213394	0.0973576
Insuline	Turbo-Flo ®	Polyurethane	10	8	2	0.0035	0.00359192	0.00350336	9.91535e-07	0.975345			0.160819
Insuline	Turbo-Flo ®	Polyurethane	10	8	3	0.0035	0.00359192	0.00337052	2.47884e-06	0.938362			0.402047
Insuline	Lifecath ®	Silicone	0	0	1	0.0035	0.00367708	0.00283662	1.20845e-05	0.771433	0.78278	0.00589615	1.91461	1.81956	0.0493895
Insuline	Lifecath ®	Silicone	0	0	2	0.0035	0.00367708	0.00290942	1.10376e-05	0.791232			1.74876
Insuline	Lifecath ®	Silicone	0	0	3	0.0035	0.00367708	0.00288898	1.13315e-05	0.785675			1.79531
Insuline	Lifecath ®	Silicone	0	24	1	0.0035	0.00367708	0.0014	3.27407e-05	0.380737	0.380737	0	5.1873	5.1873	0
Insuline	Lifecath ®	Silicone	0	24	2	0.0035	0.00367708	0.0014	3.27407e-05	0.380737			5.1873
Insuline	Lifecath ®	Silicone	0	24	3	0.0035	0.00367708	0.0014	3.27407e-05	0.380737			5.1873
Insuline	Lifecath ®	Silicone	0	96	1	0.0035	0.00367708	0.0014	3.27407e-05	0.380737	0.52657	0.10945	5.1873	3.96572	0.916819
Insuline	Lifecath ®	Silicone	0	96	2	0.0035	0.00367708	0.0016845	2.86501e-05	0.458108			4.5392
Insuline	Lifecath ®	Silicone	0	96	3	0.0035	0.00367708	0.00272421	1.37006e-05	0.740864			2.17067
Insuline	Lifecath ®	Silicone	1	0	1	0.0035	0.00348846	0.00318276	4.39547e-06	0.912368	0.84817	0.0386689	0.734052	1.27181	0.323913
Insuline	Lifecath ®	Silicone	1	0	2	0.0035	0.00348846	0.00271655	1.10989e-05	0.778724			1.85353
Insuline	Lifecath ®	Silicone	1	0	3	0.0035	0.00348846	0.00297712	7.35231e-06	0.853419			1.22785
Insuline	Lifecath ®	Silicone	1	1	1	0.0035	0.00348846	0.00167811	2.603e-05	0.481046	0.688164	0.126117	4.34706	2.61212	1.05643
Insuline	Lifecath ®	Silicone	1	1	2	0.0035	0.00348846	0.00232698	1.67003e-05	0.667049			2.78899
Insuline	Lifecath ®	Silicone	1	1	3	0.0035	0.00348846	0.00319681	4.19345e-06	0.916396			0.700314
Insuline	Lifecath ®	Silicone	1	2	1	0.0035	0.00348846	0.00256072	1.33395e-05	0.734054	0.767618	0.0186512	2.22771	1.94657	0.156233
Insuline	Lifecath ®	Silicone	1	2	2	0.0035	0.00348846	0.00268717	1.15213e-05	0.770303			1.92407
Insuline	Lifecath ®	Silicone	1	2	3	0.0035	0.00348846	0.00278552	1.01071e-05	0.798496			1.68791
Insuline	Lifecath ®	Silicone	1	4	1	0.0035	0.00348846	0.00234486	1.64432e-05	0.672175	0.619084	0.0323546	2.74605	3.19077	0.271021
Insuline	Lifecath ®	Silicone	1	4	2	0.0035	0.00348846	0.00195528	2.20447e-05	0.5605			3.68151
Insuline	Lifecath ®	Silicone	1	4	3	0.0035	0.00348846	0.00217881	1.88307e-05	0.624576			3.14477
Insuline	Lifecath ®	Silicone	1	8	1	0.0035	0.00348846	0.00248281	1.44597e-05	0.711719	0.630678	0.082694	2.41481	3.09365	0.692692
Insuline	Lifecath ®	Silicone	1	8	2	0.0035	0.00348846	0.00162319	2.68197e-05	0.465301			4.47894
Insuline	Lifecath ®	Silicone	1	8	3	0.0035	0.00348846	0.0024943	1.42945e-05	0.715015			2.3872
Insuline	Lifecath ®	Silicone	10	0	1	0.0035	0.00348846	0.00258371	1.30089e-05	0.740645	0.812166	0.0394679	2.17251	1.57341	0.330606
Insuline	Lifecath ®	Silicone	10	0	2	0.0035	0.00348846	0.00305887	6.17692e-06	0.876852			1.03156
Insuline	Lifecath ®	Silicone	10	0	3	0.0035	0.00348846	0.00285705	9.07866e-06	0.819001			1.51615
Insuline	Lifecath ®	Silicone	10	1	1	0.0035	0.00348846	0.00317382	4.52403e-06	0.909805	0.833769	0.0829028	0.755521	1.39245	0.694442
Insuline	Lifecath ®	Silicone	10	1	2	0.0035	0.00348846	0.00233081	1.66452e-05	0.668148			2.77979
Insuline	Lifecath ®	Silicone	10	1	3	0.0035	0.00348846	0.00322108	3.8445e-06	0.923353			0.64204
Insuline	Lifecath ®	Silicone	10	2	1	0.0035	0.00348846	0.0035634	-1.07744e-06	1.02148	0.929455	0.0460612	-0.179935	0.590922	0.385835
Insuline	Lifecath ®	Silicone	10	2	2	0.0035	0.00348846	0.00306908	6.03e-06	0.879781			1.00702
Insuline	Lifecath ®	Silicone	10	2	3	0.0035	0.00348846	0.00309463	5.66269e-06	0.887104			0.94568
Insuline	Lifecath ®	Silicone	10	4	1	0.0035	0.00348846	0.00330666	2.61402e-06	0.947885	0.93983	0.00898619	0.436546	0.504022	0.0752735
Insuline	Lifecath ®	Silicone	10	4	2	0.0035	0.00348846	0.00331305	2.52219e-06	0.949716			0.421211
Insuline	Lifecath ®	Silicone	10	4	3	0.0035	0.00348846	0.00321597	3.91797e-06	0.921888			0.654308
Insuline	Lifecath ®	Silicone	10	8	1	0.0035	0.00348846	0.0031636	4.67095e-06	0.906876	0.897356	0.0231148	0.780058	0.859802	0.193623
Insuline	Lifecath ®	Silicone	10	8	2	0.0035	0.00348846	0.00325046	3.4221e-06	0.931774			0.571497
Insuline	Lifecath ®	Silicone	10	8	3	0.0035	0.00348846	0.00297712	7.35231e-06	0.853419			1.22785

## Sheet: Catheter - Effect size
Reference	variable	drug	Flowrate (mL/h)	Effect size	lower limit	upper limit
Cook	Teleflex	diazepam	1	-11.4623	-19.2214	-3.85609
Cook	Teleflex	diazepam	10	-6.8068	-11.5114	-2.14869
Cook	PowerPicc	diazepam	1	17.8562	6.12833	29.8612
Cook	PowerPicc	diazepam	10	5.52408	1.65489	9.40418
Cook	Broviac	diazepam	1	272.55	94.8422	454.912
Cook	Broviac	diazepam	10	10.7223	3.58957	17.9924
Cook	Teleflex	insuline	1	-1.71026	-3.37136	0.0546519
Cook	Teleflex	insuline	10	-0.413163	-1.696	0.916835
Cook	PowerPicc	insuline	1	-0.774263	-2.11287	0.642869
Cook	PowerPicc	insuline	10	-0.201703	-1.47371	1.09422
Cook	Broviac	insuline	1	1.10267	-0.419689	2.52917
Cook	Broviac	insuline	10	1.94312	0.0728768	3.71222
Cook	Teleflex	paracetamol	1	-0.430756	-1.71523	0.902682
Cook	Teleflex	paracetamol	10	2.28902	0.252787	4.23155
Cook	PowerPicc	paracetamol	1	0.520374	-0.831934	1.81495
Cook	PowerPicc	paracetamol	10	2.07096	0.140587	3.90253
Cook	Broviac	paracetamol	1	-0.239201	-1.51193	1.06175
Cook	Broviac	paracetamol	10	-3.19148	-5.63476	-0.682886

## Sheet: Syringe - paracetamol
Drug	Reference	Material	Flowrate (mL/h)	Time (hour)	Replicate number	Theoretical concentration (mg/mL)	Initial Concentration (mg/mL)	Concentration at analytical time (mg/mL)	Sorption (mmol/L/dm²)	Remaining percentage	Mean remaining percentage	Standard error of the mean - Remaining percentage	sorption/cm²	Mean sorption/cm²	Standard error of the mean - sorption/cm²
Paracetamol	Syringe (filled at 25mL)	Polypropylene	0	0	1	1	0.990525	0.990494	5.51921e-06	0.999968	1.00072	0.000698376	8.42279e-05	-0.00190106	0.0018479
Paracetamol	Syringe (filled at 25mL)	Polypropylene	0	0	2	1	0.990525	0.991862	-0.000233996	1.00135			-0.00357099
Paracetamol	Syringe (filled at 25mL)	Polypropylene	0	0	3	1	0.990525	0.991355	-0.000145237	1.00084			-0.00221644
Paracetamol	Syringe (filled at 25mL)	Polypropylene	0	24	1	1	0.990525	0.996144	-0.000983487	1.00567	1.00733	0.00144156	-0.0150089	-0.0193998	0.00381437
Paracetamol	Syringe (filled at 25mL)	Polypropylene	0	24	2	1	0.990525	0.998721	-0.00143467	1.00827			-0.0218943
Paracetamol	Syringe (filled at 25mL)	Polypropylene	0	24	3	1	0.990525	0.998497	-0.00139547	1.00805			-0.0212961
Paracetamol	Syringe (filled at 25mL)	Polypropylene	0	96	1	1	0.990525	1.0007	-0.00178064	1.01027	1.00874	0.00144715	-0.0271741	-0.0231185	0.00382916
Paracetamol	Syringe (filled at 25mL)	Polypropylene	0	96	2	1	0.990525	0.99785	-0.00128207	1.00739			-0.0195654
Paracetamol	Syringe (filled at 25mL)	Polypropylene	0	96	3	1	0.990525	0.998992	-0.00148195	1.00855			-0.0226159
Paracetamol	Syringe (filled at 15mL)	Polypropylene	1	0	1	1	0.99062	1.01849	NA	1.02813	1.01872	0.00879176	NA	NA	NA
Paracetamol	Syringe (filled at 15mL)	Polypropylene	1	0	2	1	0.99062	1.00777	NA	1.01731			NA
Paracetamol	Syringe (filled at 15mL)	Polypropylene	1	0	3	1	0.99062	1.00124	NA	1.01072			NA
Paracetamol	Syringe (filled at 15mL)	Polypropylene	1	1	1	1	0.99062	1.00403	NA	1.01354	1.01755	0.0090889	NA	NA	NA
Paracetamol	Syringe (filled at 15mL)	Polypropylene	1	1	2	1	0.99062	1.01832	NA	1.02796			NA
Paracetamol	Syringe (filled at 15mL)	Polypropylene	1	1	3	1	0.99062	1.00168	NA	1.01116			NA
Paracetamol	Syringe (filled at 15mL)	Polypropylene	1	2	1	1	0.99062	1.00328	NA	1.01278	1.01802	0.00556601	NA	NA	NA
Paracetamol	Syringe (filled at 15mL)	Polypropylene	1	2	2	1	0.99062	1.00786	NA	1.0174			NA
Paracetamol	Syringe (filled at 15mL)	Polypropylene	1	2	3	1	0.99062	1.01426	NA	1.02387			NA
Paracetamol	Syringe (filled at 15mL)	Polypropylene	1	4	1	1	0.99062	1.00494	NA	1.01446	1.01491	0.000410077	NA	NA	NA
Paracetamol	Syringe (filled at 15mL)	Polypropylene	1	4	2	1	0.99062	1.00549	NA	1.01501			NA
Paracetamol	Syringe (filled at 15mL)	Polypropylene	1	4	3	1	0.99062	1.00574	NA	1.01526			NA
Paracetamol	Syringe (filled at 15mL)	Polypropylene	1	8	1	1	0.99062	1.00434	NA	1.01385	1.01576	0.00352325	NA	NA	NA
Paracetamol	Syringe (filled at 15mL)	Polypropylene	1	8	2	1	0.99062	1.01026	NA	1.01982			NA
Paracetamol	Syringe (filled at 15mL)	Polypropylene	1	8	3	1	0.99062	1.00409	NA	1.0136			NA
Paracetamol	Syringe (filled at 50mL)	Polypropylene	10	0	1	1	0.995699	1.00011	NA	1.00443	1.00226	0.00288054	NA	NA	NA
Paracetamol	Syringe (filled at 50mL)	Polypropylene	10	0	2	1	0.995699	0.994694	NA	0.99899			NA
Paracetamol	Syringe (filled at 50mL)	Polypropylene	10	0	3	1	0.995699	0.999031	NA	1.00335			NA
Paracetamol	Syringe (filled at 50mL)	Polypropylene	10	1	1	1	0.995699	0.999067	NA	1.00338	1.00203	0.00116902	NA	NA	NA
Paracetamol	Syringe (filled at 50mL)	Polypropylene	10	1	2	1	0.995699	0.997097	NA	1.0014			NA
Paracetamol	Syringe (filled at 50mL)	Polypropylene	10	1	3	1	0.995699	0.997009	NA	1.00132			NA
Paracetamol	Syringe (filled at 50mL)	Polypropylene	10	2	1	1	0.995699	0.993519	NA	0.99781	0.999657	0.00159925	NA	NA	NA
Paracetamol	Syringe (filled at 50mL)	Polypropylene	10	2	2	1	0.995699	0.996252	NA	1.00056			NA
Paracetamol	Syringe (filled at 50mL)	Polypropylene	10	2	3	1	0.995699	0.996301	NA	1.0006			NA
Paracetamol	Syringe (filled at 50mL)	Polypropylene	10	4	1	1	0.995699	1.00579	NA	1.01014	1.00738	0.00349296	NA	NA	NA
Paracetamol	Syringe (filled at 50mL)	Polypropylene	10	4	2	1	0.995699	1.00422	NA	1.00856			NA
Paracetamol	Syringe (filled at 50mL)	Polypropylene	10	4	3	1	0.995699	0.999139	NA	1.00345			NA
Paracetamol	Syringe (filled at 50mL)	Polypropylene	10	8	1	1	0.995699	0.998069	NA	1.00238	1.00293	0.000690785	NA	NA	NA
Paracetamol	Syringe (filled at 50mL)	Polypropylene	10	8	2	1	0.995699	0.998398	NA	1.00271			NA
Paracetamol	Syringe (filled at 50mL)	Polypropylene	10	8	3	1	0.995699	0.99939	NA	1.00371			NA
NA	Not applicable

## Sheet: Syringe - diazepam
Drug	Reference	Material	Flowrate (mL/h)	Time (hour)	Replicate number	Theoretical concentration (mg/mL)	Initial Concentration (mg/mL)	Concentration at analytical time (mg/mL)	Sorption (mmol/L/dm²)	Remaining percentage	Mean remaining percentage	Standard error of the mean - Remaining percentage	sorption/cm²	Mean sorption/cm²	Standard error of the mean - sorption/cm²
Diazepam	Syringe (filled at 15mL)	Polypropylene	0	0	1	0.2	0.200259	0.198061	0.000340357	0.989026	0.987825	0.00229009	0.0483944	0.0536925	0.0100993
Diazepam	Syringe (filled at 15mL)	Polypropylene	0	0	2	0.2	0.200259	0.198109	0.000332973	0.989264			0.0473446
Diazepam	Syringe (filled at 15mL)	Polypropylene	0	0	3	0.2	0.200259	0.197292	0.000459523	0.985184			0.0653384
Diazepam	Syringe (filled at 15mL)	Polypropylene	0	24	1	0.2	0.200259	0.122661	0.0120181	0.612512	0.616001	0.00500461	1.70882	1.69344	0.0220703
Diazepam	Syringe (filled at 15mL)	Polypropylene	0	24	2	0.2	0.200259	0.12291	0.0119795	0.613756			1.70334
Diazepam	Syringe (filled at 15mL)	Polypropylene	0	24	3	0.2	0.200259	0.124508	0.0117321	0.621735			1.66815
Diazepam	Syringe (filled at 15mL)	Polypropylene	0	96	1	0.2	0.200259	0.0825643	0.0182281	0.412288	0.408604	0.00830426	2.59181	2.60806	0.0366218
Diazepam	Syringe (filled at 15mL)	Polypropylene	0	96	2	0.2	0.200259	0.0829931	0.0181617	0.414429			2.58237
Diazepam	Syringe (filled at 15mL)	Polypropylene	0	96	3	0.2	0.200259	0.0799223	0.0186373	0.399095			2.64999
Diazepam	Syringe (filled at 25mL)	Polypropylene	0	0	1	0.2	0.201504	0.201596	-8.50853e-06	1.00045	0.997815	0.00679688	-0.00120233	0.00578178	0.0179845
Diazepam	Syringe (filled at 25mL)	Polypropylene	0	0	2	0.2	0.201504	0.202088	-5.42295e-05	1.0029			-0.00766311
Diazepam	Syringe (filled at 25mL)	Polypropylene	0	0	3	0.2	0.201504	0.199508	0.000185486	0.990094			0.0262108
Diazepam	Syringe (filled at 25mL)	Polypropylene	0	24	1	0.2	0.201504	0.14974	0.00481021	0.743112	0.750245	0.00691584	0.679725	0.660853	0.0182993
Diazepam	Syringe (filled at 25mL)	Polypropylene	0	24	2	0.2	0.201504	0.151269	0.00466811	0.750701			0.659646
Diazepam	Syringe (filled at 25mL)	Polypropylene	0	24	3	0.2	0.201504	0.152523	0.00455164	0.756921			0.643187
Diazepam	Syringe (filled at 25mL)	Polypropylene	0	96	1	0.2	0.201504	0.113071	0.00821773	0.561135	0.556229	0.0054354	1.16124	1.17422	0.0143821
Diazepam	Syringe (filled at 25mL)	Polypropylene	0	96	2	0.2	0.201504	0.112271	0.00829207	0.557165			1.17174
Diazepam	Syringe (filled at 25mL)	Polypropylene	0	96	3	0.2	0.201504	0.110905	0.008419	0.550386			1.18968
Diazepam	Syringe (filled at 15mL) without stopper contact	Polypropylene	0	0	1	0.2	0.194559	0.193635	0.000143129	0.99525	0.996714	0.00127091	0.0209473	0.0144901	0.00560471
Diazepam	Syringe (filled at 15mL) without stopper contact	Polypropylene	0	0	2	0.2	0.194559	0.194046	7.95145e-05	0.997361			0.0116372
Diazepam	Syringe (filled at 15mL) without stopper contact	Polypropylene	0	0	3	0.2	0.194559	0.194079	7.43812e-05	0.997532			0.0108859
Diazepam	Syringe (filled at 15mL) without stopper contact	Polypropylene	0	24	1	0.2	0.194559	0.191491	0.000475266	0.984228	0.985452	0.00270608	0.0695565	0.0641559	0.0119338
Diazepam	Syringe (filled at 15mL) without stopper contact	Polypropylene	0	24	2	0.2	0.194559	0.192333	0.000344896	0.988554			0.0504765
Diazepam	Syringe (filled at 15mL) without stopper contact	Polypropylene	0	24	3	0.2	0.194559	0.191364	0.000494932	0.983575			0.0724346
Diazepam	Syringe (filled at 15mL) without stopper contact	Polypropylene	0	96	1	0.2	0.194559	0.188786	0.000894153	0.970326	0.964074	0.0054245	0.130862	0.158432	0.023922
Diazepam	Syringe (filled at 15mL) without stopper contact	Polypropylene	0	96	2	0.2	0.194559	0.187027	0.00116666	0.961283			0.170744
Diazepam	Syringe (filled at 15mL) without stopper contact	Polypropylene	0	96	3	0.2	0.194559	0.186897	0.00118679	0.960614			0.173691
Diazepam	Syringe (filled at 25mL) without stopper contact	Polypropylene	0	0	1	0.2	0.194559	0.193104	0.000135255	0.992519	0.994828	0.00240057	0.0197949	0.0136853	0.00635192
Diazepam	Syringe (filled at 25mL) without stopper contact	Polypropylene	0	0	2	0.2	0.194559	0.194036	4.86228e-05	0.997311			0.00711608
Diazepam	Syringe (filled at 25mL) without stopper contact	Polypropylene	0	0	3	0.2	0.194559	0.193519	9.66503e-05	0.994654			0.014145
Diazepam	Syringe (filled at 25mL) without stopper contact	Polypropylene	0	24	1	0.2	0.194559	0.191738	0.000262222	0.985496	0.987677	0.00197807	0.0383769	0.0326076	0.00523397
Diazepam	Syringe (filled at 25mL) without stopper contact	Polypropylene	0	24	2	0.2	0.194559	0.192489	0.000192438	0.989356			0.0281638
Diazepam	Syringe (filled at 25mL) without stopper contact	Polypropylene	0	24	3	0.2	0.194559	0.192259	0.000213744	0.988178			0.0312821
Diazepam	Syringe (filled at 25mL) without stopper contact	Polypropylene	0	96	1	0.2	0.194559	0.190556	0.000372017	0.979423	0.976384	0.00265009	0.0544457	0.0624866	0.00701214
Diazepam	Syringe (filled at 25mL) without stopper contact	Polypropylene	0	96	2	0.2	0.194559	0.189609	0.000460056	0.974554			0.0673304
Diazepam	Syringe (filled at 25mL) without stopper contact	Polypropylene	0	96	3	0.2	0.194559	0.18973	0.000448805	0.975176			0.0656838
Diazepam	Syringe	Polypropylene	1	0	1	0.2	0.205268	0.194672	NA	0.948381	0.931468	0.0341591	NA	NA	NA
Diazepam	Syringe	Polypropylene	1	0	2	0.2	0.205268	0.195799	NA	0.95387			NA
Diazepam	Syringe	Polypropylene	1	0	3	0.2	0.205268	0.18313	NA	0.892152			NA
Diazepam	Syringe	Polypropylene	1	1	1	0.2	0.205268	0.190266	NA	0.926915	0.906823	0.0181493	NA	NA	NA
Diazepam	Syringe	Polypropylene	1	1	2	0.2	0.205268	0.18302	NA	0.891617			NA
Diazepam	Syringe	Polypropylene	1	1	3	0.2	0.205268	0.185139	NA	0.901936			NA
Diazepam	Syringe	Polypropylene	1	2	1	0.2	0.205268	0.187403	NA	0.912969	0.88771	0.0219172	NA	NA	NA
Diazepam	Syringe	Polypropylene	1	2	2	0.2	0.205268	0.179905	NA	0.876438			NA
Diazepam	Syringe	Polypropylene	1	2	3	0.2	0.205268	0.179347	NA	0.873723			NA
Diazepam	Syringe	Polypropylene	1	4	1	0.2	0.205268	0.152777	NA	0.744282	0.770418	0.0234995	NA	NA	NA
Diazepam	Syringe	Polypropylene	1	4	2	0.2	0.205268	0.159528	NA	0.777169			NA
Diazepam	Syringe	Polypropylene	1	4	3	0.2	0.205268	0.162121	NA	0.789803			NA
Diazepam	Syringe	Polypropylene	1	8	1	0.2	0.205268	0.124846	NA	0.608211	0.595892	0.0232177	NA	NA	NA
Diazepam	Syringe	Polypropylene	1	8	2	0.2	0.205268	0.11682	NA	0.569111			NA
Diazepam	Syringe	Polypropylene	1	8	3	0.2	0.205268	0.125286	NA	0.610354			NA
Diazepam	Syringe	Polypropylene	10	0	1	0.2	0.205268	0.204149	NA	0.994551	0.992462	0.00191982	NA	NA	NA
Diazepam	Syringe	Polypropylene	10	0	2	0.2	0.205268	0.203374	NA	0.990774			NA
Diazepam	Syringe	Polypropylene	10	0	3	0.2	0.205268	0.203639	NA	0.992062			NA
Diazepam	Syringe	Polypropylene	10	1	1	0.2	0.205268	0.205549	NA	1.00137	0.993121	0.00935778	NA	NA	NA
Diazepam	Syringe	Polypropylene	10	1	2	0.2	0.205268	0.201769	NA	0.982952			NA
Diazepam	Syringe	Polypropylene	10	1	3	0.2	0.205268	0.20425	NA	0.995042			NA
Diazepam	Syringe	Polypropylene	10	2	1	0.2	0.205268	0.199313	NA	0.97099	0.968635	0.00298106	NA	NA	NA
Diazepam	Syringe	Polypropylene	10	2	2	0.2	0.205268	0.199034	NA	0.969632			NA
Diazepam	Syringe	Polypropylene	10	2	3	0.2	0.205268	0.198142	NA	0.965283			NA
Diazepam	Syringe	Polypropylene	10	4	1	0.2	0.205268	0.188386	NA	0.917755	0.964548	0.0405335	NA	NA	NA
Diazepam	Syringe	Polypropylene	10	4	2	0.2	0.205268	0.20297	NA	0.988803			NA
Diazepam	Syringe	Polypropylene	10	4	3	0.2	0.205268	0.202618	NA	0.987088			NA
Diazepam	Syringe	Polypropylene	10	8	1	0.2	0.205268	0.181215	NA	0.882823	0.879369	0.0101855	NA	NA	NA
Diazepam	Syringe	Polypropylene	10	8	2	0.2	0.205268	0.18215	NA	0.887378			NA
Diazepam	Syringe	Polypropylene	10	8	3	0.2	0.205268	0.178153	NA	0.867906			NA
NA	Not applicable

## Sheet: Syringe - insulin
Drug	Reference	Material	Flowrate (mL/h)	Time (hour)	Replicate number	Theoretical concentration (mg/mL)	Initial Concentration (mg/mL)	Concentration at analytical time (mg/mL)	Sorption (mmol/L/dm²)	Remaining percentage	Mean remaining percentage	Standard error of the mean - Remaining percentage	sorption/cm²	Mean sorption/cm²	Standard error of the mean - sorption/cm²
Insuline	Syringe (filled at 25mL)	Polypropylene	0	0	1	0.0035	0.00356212	0.00330538	1.16606e-06	0.927926	0.980159	0.0861588	0.190708	0.0525	0.227976
Insuline	Syringe (filled at 25mL)	Polypropylene	0	0	2	0.0035	0.00356212	0.00332327	1.08484e-06	0.932946			0.177425
Insuline	Syringe (filled at 25mL)	Polypropylene	0	0	3	0.0035	0.00356212	0.00384568	-1.28789e-06	1.0796			-0.210633
Insuline	Syringe (filled at 25mL)	Polypropylene	0	24	1	0.0035	0.00356212	0.00312912	1.96664e-06	0.878442	0.896849	0.0160053	0.321642	0.272937	0.04235
Insuline	Syringe (filled at 25mL)	Polypropylene	0	24	2	0.0035	0.00356212	0.00323258	1.49674e-06	0.907487			0.244789
Insuline	Syringe (filled at 25mL)	Polypropylene	0	24	3	0.0035	0.00356212	0.00322236	1.54315e-06	0.904618			0.25238
Insuline	Syringe (filled at 25mL)	Polypropylene	0	96	1	0.0035	0.00356212	0.00354807	6.38143e-08	0.996056	0.963545	0.0324514	0.0104367	0.0964608	0.0858664
Insuline	Syringe (filled at 25mL)	Polypropylene	0	96	2	0.0035	0.00356212	0.00343184	5.91733e-07	0.963425			0.0967771
Insuline	Syringe (filled at 25mL)	Polypropylene	0	96	3	0.0035	0.00356212	0.00331688	1.11385e-06	0.931153			0.182169
Insuline	Syringe (filled at 25mL) without stopper contact	Polypropylene	0	0	1	0.0035	0.00356212	0.00478194	-5.54024e-06	1.34244	1.07279	0.235598	-0.906099	-0.192605	0.623393
Insuline	Syringe (filled at 25mL) without stopper contact	Polypropylene	0	0	2	0.0035	0.00356212	0.00323002	1.50834e-06	0.90677			0.246687
Insuline	Syringe (filled at 25mL) without stopper contact	Polypropylene	0	0	3	0.0035	0.00356212	0.00345227	4.98912e-07	0.969162			0.0815964
Insuline	Syringe (filled at 25mL) without stopper contact	Polypropylene	0	24	1	0.0035	0.00356212	0.0031751	1.75779e-06	0.891351	0.896371	0.00748731	0.287485	0.274202	0.0198114
Insuline	Syringe (filled at 25mL) without stopper contact	Polypropylene	0	24	2	0.0035	0.00356212	0.00318021	1.73459e-06	0.892785			0.28369
Insuline	Syringe (filled at 25mL) without stopper contact	Polypropylene	0	24	3	0.0035	0.00356212	0.00322364	1.53734e-06	0.904977			0.251431
Insuline	Syringe (filled at 25mL) without stopper contact	Polypropylene	0	96	1	0.0035	0.00356212	0.0034395	5.56925e-07	0.965577	0.940357	0.0281439	0.0910843	0.157816	0.0744688
Insuline	Syringe (filled at 25mL) without stopper contact	Polypropylene	0	96	2	0.0035	0.00356212	0.00336797	8.81798e-07	0.945496			0.144217
Insuline	Syringe (filled at 25mL) without stopper contact	Polypropylene	0	96	3	0.0035	0.00356212	0.00324152	1.45613e-06	0.909997			0.238148
Insuline	Syringe	Polypropylene	1	0	1	0.0035	0.00368474	0.00288132	NA	0.781961	0.811425	0.0256493	NA	NA	NA
Insuline	Syringe	Polypropylene	1	0	2	0.0035	0.00368474	0.0030346	NA	0.823558			NA
Insuline	Syringe	Polypropylene	1	0	3	0.0035	0.00368474	0.00305376	NA	0.828758			NA
Insuline	Syringe	Polypropylene	1	1	1	0.0035	0.00368474	0.00272805	NA	0.740363	0.806226	0.0648475	NA	NA	NA
Insuline	Syringe	Polypropylene	1	1	2	0.0035	0.00368474	0.0029784	NA	0.808306			NA
Insuline	Syringe	Polypropylene	1	1	3	0.0035	0.00368474	0.00320575	NA	0.870008			NA
Insuline	Syringe	Polypropylene	1	2	1	0.0035	0.00368474	0.00258371	NA	0.701192	0.801835	0.0873698	NA	NA	NA
Insuline	Syringe	Polypropylene	1	2	2	0.0035	0.00368474	0.00311762	NA	0.84609			NA
Insuline	Syringe	Polypropylene	1	2	3	0.0035	0.00368474	0.00316233	NA	0.858222			NA
Insuline	Syringe	Polypropylene	1	4	1	0.0035	0.00368474	0.00316616	NA	0.859262	0.824598	0.0670638	NA	NA	NA
Insuline	Syringe	Polypropylene	1	4	2	0.0035	0.00368474	0.00275359	NA	0.747296			NA
Insuline	Syringe	Polypropylene	1	4	3	0.0035	0.00368474	0.00319554	NA	0.867235			NA
Insuline	Syringe	Polypropylene	1	8	1	0.0035	0.00368474	0.00283406	NA	0.769135	0.764975	0.0241882	NA	NA	NA
Insuline	Syringe	Polypropylene	1	8	2	0.0035	0.00368474	0.0028992	NA	0.786814			NA
Insuline	Syringe	Polypropylene	1	8	3	0.0035	0.00368474	0.00272294	NA	0.738977			NA
Insuline	Syringe	Polypropylene	10	0	1	0.0035	0.00368474	0.00326962	NA	0.887341	0.853138	0.0330047	NA	NA	NA
Insuline	Syringe	Polypropylene	10	0	2	0.0035	0.00368474	0.00313423	NA	0.850596			NA
Insuline	Syringe	Polypropylene	10	0	3	0.0035	0.00368474	0.00302693	NA	0.821478			NA
Insuline	Syringe	Polypropylene	10	1	1	0.0035	0.00368474	0.00313039	NA	0.849556	0.832917	0.0306384	NA	NA	NA
Insuline	Syringe	Polypropylene	10	1	2	0.0035	0.00368474	0.00313806	NA	0.851636			NA
Insuline	Syringe	Polypropylene	10	1	3	0.0035	0.00368474	0.0029388	NA	0.79756			NA
Insuline	Syringe	Polypropylene	10	2	1	0.0035	0.00368474	0.00316871	NA	0.859956	0.865271	0.016264	NA	NA	NA
Insuline	Syringe	Polypropylene	10	2	2	0.0035	0.00368474	0.00314061	NA	0.852329			NA
Insuline	Syringe	Polypropylene	10	2	3	0.0035	0.00368474	0.00325557	NA	0.883527			NA
Insuline	Syringe	Polypropylene	10	4	1	0.0035	0.00368474	0.00329772	NA	0.894967	0.848632	0.0500926	NA	NA	NA
Insuline	Syringe	Polypropylene	10	4	2	0.0035	0.00368474	0.00315211	NA	0.855449			NA
Insuline	Syringe	Polypropylene	10	4	3	0.0035	0.00368474	0.00293114	NA	0.79548			NA
Insuline	Syringe	Polypropylene	10	8	1	0.0035	0.00368474	0.00307164	NA	0.833611	0.855449	0.0272265	NA	NA	NA
Insuline	Syringe	Polypropylene	10	8	2	0.0035	0.00368474	0.00312018	NA	0.846783			NA
Insuline	Syringe	Polypropylene	10	8	3	0.0035	0.00368474	0.00326451	NA	0.885954			NA
NA	Not applicable

## Sheet: Complete setup - paracetamol
Drug	Reference	Flowrate (mL/h)	Time (hour)	Replicate number	Theoretical concentration (mg/mL)	Concentration at analytical time (mg/mL)	Initial Concentration (mg/mL)	Remaining percentage	Mean remaining percentage	Standard error of the mean - Remaining percentage
paracetamol	Setup 1	1	0	1	1	0.10237	0.102714	0.996656	0.992391	0.00410179
paracetamol	Setup 1	1	0	2	1	0.102337	0.102714	0.996327
paracetamol	Setup 1	1	0	3	1	0.10109	0.102714	0.984189
paracetamol	Setup 1	1	1	1	1	0.0987853	0.102714	0.961753	0.961099	0.00540347
paracetamol	Setup 1	1	1	2	1	0.0996441	0.102714	0.970114
paracetamol	Setup 1	1	1	3	1	0.097725	0.102714	0.95143
paracetamol	Setup 1	1	2	1	1	0.115913	0.102714	1.12851	1.07173	0.0523995
paracetamol	Setup 1	1	2	2	1	0.115002	0.102714	1.11963
paracetamol	Setup 1	1	2	3	1	0.0993304	0.102714	0.967059
paracetamol	Setup 1	1	4	1	1	0.100187	0.102714	0.975399	0.974706	0.000391671
paracetamol	Setup 1	1	4	2	1	0.100048	0.102714	0.974043
paracetamol	Setup 1	1	4	3	1	0.100113	0.102714	0.974678
paracetamol	Setup 1	1	8	1	1	0.101381	0.102714	0.987023	0.973442	0.00893071
paracetamol	Setup 1	1	8	2	1	0.100321	0.102714	0.9767
paracetamol	Setup 1	1	8	3	1	0.0982565	0.102714	0.956605
paracetamol	Setup 1	10	0	1	1	0.10155	0.102714	0.988667	0.988171	0.00058276
paracetamol	Setup 1	10	0	2	1	0.10138	0.102714	0.987009
paracetamol	Setup 1	10	0	3	1	0.101567	0.102714	0.988836
paracetamol	Setup 1	10	1	1	1	0.100642	0.102714	0.97983	0.980773	0.000866964
paracetamol	Setup 1	10	1	2	1	0.100658	0.102714	0.979984
paracetamol	Setup 1	10	1	3	1	0.100917	0.102714	0.982504
paracetamol	Setup 1	10	2	1	1	0.0997586	0.102714	0.971228	0.977199	0.00509499
paracetamol	Setup 1	10	2	2	1	0.101413	0.102714	0.987336
paracetamol	Setup 1	10	2	3	1	0.0999441	0.102714	0.973034
paracetamol	Setup 1	10	4	1	1	0.101192	0.102714	0.985181	0.987345	0.00111347
paracetamol	Setup 1	10	4	2	1	0.101478	0.102714	0.98797
paracetamol	Setup 1	10	4	3	1	0.101572	0.102714	0.988883
paracetamol	Setup 1	10	8	1	1	0.100764	0.102714	0.981021	0.983944	0.00214764
paracetamol	Setup 1	10	8	2	1	0.101495	0.102714	0.988131
paracetamol	Setup 1	10	8	3	1	0.100935	0.102714	0.982681
paracetamol	Setup 2	1	0	1	1	0.10266	0.103012	0.996581	0.99168	0.0029172
paracetamol	Setup 2	1	0	2	1	0.102185	0.103012	0.991971
paracetamol	Setup 2	1	0	3	1	0.101621	0.103012	0.986488
paracetamol	Setup 2	1	1	1	1	0.0986791	0.103012	0.957934	0.966806	0.00537081
paracetamol	Setup 2	1	1	2	1	0.10059	0.103012	0.976486
paracetamol	Setup 2	1	1	3	1	0.0995099	0.103012	0.965999
paracetamol	Setup 2	1	2	1	1	0.101866	0.103012	0.988875	0.976966	0.00686577
paracetamol	Setup 2	1	2	2	1	0.100636	0.103012	0.976931
paracetamol	Setup 2	1	2	3	1	0.0994164	0.103012	0.965091
paracetamol	Setup 2	1	4	1	1	0.10153	0.103012	0.985611	0.984101	0.00305705
paracetamol	Setup 2	1	4	2	1	0.101825	0.103012	0.988477
paracetamol	Setup 2	1	4	3	1	0.100768	0.103012	0.978215
paracetamol	Setup 2	1	8	1	1	0.102501	0.103012	0.995031	0.988575	0.00342088
paracetamol	Setup 2	1	8	2	1	0.101705	0.103012	0.987311
paracetamol	Setup 2	1	8	3	1	0.101301	0.103012	0.983385
paracetamol	Setup 2	10	0	1	1	0.10213	0.103012	0.991437	0.989735	0.000851184
paracetamol	Setup 2	10	0	2	1	0.101869	0.103012	0.988898
paracetamol	Setup 2	10	0	3	1	0.101866	0.103012	0.988869
paracetamol	Setup 2	10	1	1	1	0.100928	0.103012	0.979765	0.984803	0.00258092
paracetamol	Setup 2	10	1	2	1	0.101606	0.103012	0.986347
paracetamol	Setup 2	10	1	3	1	0.101807	0.103012	0.988297
paracetamol	Setup 2	10	2	1	1	0.101521	0.103012	0.985521	0.984143	0.00331773
paracetamol	Setup 2	10	2	2	1	0.100729	0.103012	0.977833
paracetamol	Setup 2	10	2	3	1	0.101887	0.103012	0.989075
paracetamol	Setup 2	10	4	1	1	0.101381	0.103012	0.984163	0.984752	0.00547505
paracetamol	Setup 2	10	4	2	1	0.102448	0.103012	0.994516
paracetamol	Setup 2	10	4	3	1	0.100497	0.103012	0.975577
paracetamol	Setup 2	10	8	1	1	0.101989	0.103012	0.990067	0.987865	0.00164269
paracetamol	Setup 2	10	8	2	1	0.101866	0.103012	0.988875
paracetamol	Setup 2	10	8	3	1	0.101431	0.103012	0.984652

## Sheet: Complete setup - diazepam
Drug	Reference	Flowrate (mL/h)	Time (hour)	Replicate number	Theoretical concentration (mg/mL)	Concentration at analytical time (mg/mL)	Initial Concentration (mg/mL)	Remaining percentage	Mean remaining percentage	Standard error of the mean - Remaining percentage
diazepam	Setup 1	1	0	1	0.2	18.3534	19.9027	0.92216	0.923336	0.00102993
diazepam	Setup 1	1	0	2	0.2	18.4177	19.9027	0.925388
diazepam	Setup 1	1	0	3	0.2	18.3594	19.9027	0.922458
diazepam	Setup 1	1	1	1	0.2	1.65448	19.9027	0.0831285	0.0867167	0.00243323
diazepam	Setup 1	1	1	2	0.2	1.70493	19.9027	0.0856637
diazepam	Setup 1	1	1	3	0.2	1.81826	19.9027	0.0913578
diazepam	Setup 1	1	2	1	0.2	0.94515	19.9027	0.0474886	0.0480911	0.000328506
diazepam	Setup 1	1	2	2	0.2	0.958621	19.9027	0.0481655
diazepam	Setup 1	1	2	3	0.2	0.967653	19.9027	0.0486193
diazepam	Setup 1	1	4	1	0.2	0.688413	19.9027	0.034589	0.0338252	0.000419051
diazepam	Setup 1	1	4	2	0.2	0.671559	19.9027	0.0337422
diazepam	Setup 1	1	4	3	0.2	0.659664	19.9027	0.0331445
diazepam	Setup 1	1	8	1	0.2	0.534564	19.9027	0.0268589	0.0362325	0.00916206
diazepam	Setup 1	1	8	2	0.2	0.543014	19.9027	0.0272835
diazepam	Setup 1	1	8	3	0.2	1.08579	19.9027	0.0545549
diazepam	Setup 1	10	0	1	0.2	18.4768	19.9027	0.928361	0.930333	0.00115149
diazepam	Setup 1	10	0	2	0.2	18.5152	19.9027	0.930288
diazepam	Setup 1	10	0	3	0.2	18.5562	19.9027	0.932349
diazepam	Setup 1	10	1	1	0.2	2.62146	19.9027	0.131714	0.159894	0.0189663
diazepam	Setup 1	10	1	2	0.2	3.02508	19.9027	0.151994
diazepam	Setup 1	10	1	3	0.2	3.90042	19.9027	0.195975
diazepam	Setup 1	10	2	1	0.2	2.70869	19.9027	0.136097	0.144931	0.0103499
diazepam	Setup 1	10	2	2	0.2	3.29509	19.9027	0.16556
diazepam	Setup 1	10	2	3	0.2	2.64977	19.9027	0.133136
diazepam	Setup 1	10	4	1	0.2	3.73443	19.9027	0.187635	0.193333	0.0135022
diazepam	Setup 1	10	4	2	0.2	4.35951	19.9027	0.219042
diazepam	Setup 1	10	4	3	0.2	3.44957	19.9027	0.173322
diazepam	Setup 1	10	8	1	0.2	4.69001	19.9027	0.235647	0.274098	0.0219028
diazepam	Setup 1	10	8	2	0.2	6.19966	19.9027	0.311499
diazepam	Setup 1	10	8	3	0.2	5.47617	19.9027	0.275148
diazepam	Setup 2	1	0	1	0.2	17.5349	20.0173	0.875987	0.906581	0.015453
diazepam	Setup 2	1	0	2	0.2	18.3776	20.0173	0.918085
diazepam	Setup 2	1	0	3	0.2	18.5295	20.0173	0.925672
diazepam	Setup 2	1	1	1	0.2	2.54025	20.0173	0.126903	0.143606	0.00867366
diazepam	Setup 2	1	1	2	0.2	3.12298	20.0173	0.156014
diazepam	Setup 2	1	1	3	0.2	2.96056	20.0173	0.1479
diazepam	Setup 2	1	2	1	0.2	1.91198	20.0173	0.0955164	0.0961317	0.00496707
diazepam	Setup 2	1	2	2	0.2	2.10234	20.0173	0.105026
diazepam	Setup 2	1	2	3	0.2	1.75858	20.0173	0.0878527
diazepam	Setup 2	1	4	1	0.2	1.99964	20.0173	0.0998954	0.10914	0.00478547
diazepam	Setup 2	1	4	2	0.2	2.23424	20.0173	0.111615
diazepam	Setup 2	1	4	3	0.2	2.32018	20.0173	0.115909
diazepam	Setup 2	1	8	1	0.2	3.25635	20.0173	0.162677	0.164352	0.00147284
diazepam	Setup 2	1	8	2	0.2	3.26466	20.0173	0.163092
diazepam	Setup 2	1	8	3	0.2	3.34866	20.0173	0.167288
diazepam	Setup 2	10	0	1	0.2	18.5922	20.0173	0.928808	0.925885	0.00314339
diazepam	Setup 2	10	0	2	0.2	18.408	20.0173	0.919604
diazepam	Setup 2	10	0	3	0.2	18.601	20.0173	0.929245
diazepam	Setup 2	10	1	1	0.2	13.8615	20.0173	0.692476	0.69233	0.00271552
diazepam	Setup 2	10	1	2	0.2	13.763	20.0173	0.687556
diazepam	Setup 2	10	1	3	0.2	13.9512	20.0173	0.696959
diazepam	Setup 2	10	2	1	0.2	14.659	20.0173	0.732317	0.733677	0.00339705
diazepam	Setup 2	10	2	2	0.2	14.5845	20.0173	0.728593
diazepam	Setup 2	10	2	3	0.2	14.8153	20.0173	0.740122
diazepam	Setup 2	10	4	1	0.2	14.6487	20.0173	0.7318	0.750825	0.0133873
diazepam	Setup 2	10	4	2	0.2	14.8933	20.0173	0.744022
diazepam	Setup 2	10	4	3	0.2	15.5465	20.0173	0.776653
diazepam	Setup 2	10	8	1	0.2	16.5801	20.0173	0.82829	0.829367	0.00337831
diazepam	Setup 2	10	8	2	0.2	16.4968	20.0173	0.824129
diazepam	Setup 2	10	8	3	0.2	16.7281	20.0173	0.835682

## Sheet: Complete setup - insulin
Drug	Reference	Flowrate (mL/h)	Time (hour)	Replicate number	Theoretical concentration (mg/mL)	Concentration at analytical time (mg/mL)	Initial Concentration (mg/mL)	Remaining percentage	Mean remaining percentage	Standard error of the mean - Remaining percentage
insuline	Setup 1	1	0	1	0.0035	0.0034395	0.00381758	0.900964	0.920369	0.014968
insuline	Setup 1	1	0	2	0.0035	0.00362598	0.00381758	0.949813
insuline	Setup 1	1	0	3	0.0035	0.00347526	0.00381758	0.910332
insuline	Setup 1	1	1	1	0.0035	0.000422529	0.00381758	0.11068	0.219977	0.0549549
insuline	Setup 1	1	1	2	0.0035	0.00101008	0.00381758	0.264588
insuline	Setup 1	1	1	3	0.0035	0.00108672	0.00381758	0.284663
insuline	Setup 1	1	2	1	0.0035	0.00190419	0.00381758	0.498796	0.515525	0.0142934
insuline	Setup 1	1	2	2	0.0035	0.00207663	0.00381758	0.543964
insuline	Setup 1	1	2	3	0.0035	0.00192335	0.00381758	0.503814
insuline	Setup 1	1	4	1	0.0035	0.00211494	0.00381758	0.554002	0.562143	0.00581549
insuline	Setup 1	1	4	2	0.0035	0.0021341	0.00381758	0.55902
insuline	Setup 1	1	4	3	0.0035	0.00218903	0.00381758	0.573407
insuline	Setup 1	1	8	1	0.0035	0.00217753	0.00381758	0.570396	0.460319	0.0553533
insuline	Setup 1	1	8	2	0.0035	0.00150823	0.00381758	0.395075
insuline	Setup 1	1	8	3	0.0035	0.00158614	0.00381758	0.415484
insuline	Setup 1	10	0	1	0.0035	0.0033718	0.00381758	0.883231	0.900183	0.00855496
insuline	Setup 1	10	0	2	0.0035	0.00347654	0.00381758	0.910666
insuline	Setup 1	10	0	3	0.0035	0.00346121	0.00381758	0.906651
insuline	Setup 1	10	1	1	0.0035	0.00279319	0.00381758	0.731665	0.725865	0.0266229
insuline	Setup 1	10	1	2	0.0035	0.00293497	0.00381758	0.768804
insuline	Setup 1	10	1	3	0.0035	0.00258499	0.00381758	0.677128
insuline	Setup 1	10	2	1	0.0035	0.00359916	0.00381758	0.942786	0.992305	0.0255191
insuline	Setup 1	10	2	2	0.0035	0.00384185	0.00381758	1.00636
insuline	Setup 1	10	2	3	0.0035	0.00392359	0.00381758	1.02777
insuline	Setup 1	10	4	1	0.0035	0.0036362	0.00381758	0.952489	0.960296	0.00427312
insuline	Setup 1	10	4	2	0.0035	0.00366941	0.00381758	0.961188
insuline	Setup 1	10	4	3	0.0035	0.0036924	0.00381758	0.967211
insuline	Setup 1	10	8	1	0.0035	0.00349953	0.00381758	0.916689	0.915462	0.0238645
insuline	Setup 1	10	8	2	0.0035	0.00333476	0.00381758	0.873528
insuline	Setup 1	10	8	3	0.0035	0.00365025	0.00381758	0.95617
insuline	Setup 2	1	0	1	0.0035	0.00316871	0.00361875	0.875638	0.900934	0.0318612
insuline	Setup 2	1	0	2	0.0035	0.00348931	0.00361875	0.964233
insuline	Setup 2	1	0	3	0.0035	0.00312273	0.00361875	0.862932
insuline	Setup 2	1	1	1	0.0035	0.000259035	0.00361875	0.0715815	0.0565216	0.0248094
insuline	Setup 2	1	1	2	0.0035	0.000325455	0.00361875	0.0899358
insuline	Setup 2	1	1	3	0.0035	2.91223e-05	0.00361875	0.00804763
insuline	Setup 2	1	2	1	0.0035	0.0013639	0.00361875	0.376897	0.355366	0.0122322
insuline	Setup 2	1	2	2	0.0035	0.00128343	0.00361875	0.35466
insuline	Setup 2	1	2	3	0.0035	0.00121062	0.00361875	0.334541
insuline	Setup 2	1	4	1	0.0035	0.00114803	0.00361875	0.317246	0.32254	0.00656871
insuline	Setup 2	1	4	2	0.0035	0.00113909	0.00361875	0.314775
insuline	Setup 2	1	4	3	0.0035	0.00121445	0.00361875	0.3356
insuline	Setup 2	1	8	1	0.0035	0.00119657	0.00361875	0.330659	0.338777	0.0118248
insuline	Setup 2	1	8	2	0.0035	0.00131025	0.00361875	0.362073
insuline	Setup 2	1	8	3	0.0035	0.00117102	0.00361875	0.323599
insuline	Setup 2	10	0	1	0.0035	0.00210728	0.00361875	0.582323	0.773513	0.0956289
insuline	Setup 2	10	0	2	0.0035	0.00312912	0.00361875	0.864696
insuline	Setup 2	10	0	3	0.0035	0.00316105	0.00361875	0.87352
insuline	Setup 2	10	1	1	0.0035	0.0017292	0.00361875	0.477845	0.439843	0.0198105
insuline	Setup 2	10	1	2	0.0035	0.00155804	0.00361875	0.430548
insuline	Setup 2	10	1	3	0.0035	0.00148779	0.00361875	0.411135
insuline	Setup 2	10	2	1	0.0035	0.0034676	0.00361875	0.958232	0.940349	0.00908921
insuline	Setup 2	10	2	2	0.0035	0.00336031	0.00361875	0.928583
insuline	Setup 2	10	2	3	0.0035	0.00338074	0.00361875	0.934231
insuline	Setup 2	10	4	1	0.0035	0.00351486	0.00361875	0.971292	0.922465	0.0309688
insuline	Setup 2	10	4	2	0.0035	0.00313039	0.00361875	0.865049
insuline	Setup 2	10	4	3	0.0035	0.00336925	0.00361875	0.931054
insuline	Setup 2	10	8	1	0.0035	0.00333732	0.00361875	0.92223	0.92023	0.0280383
insuline	Setup 2	10	8	2	0.0035	0.00350209	0.00361875	0.967762
insuline	Setup 2	10	8	3	0.0035	0.00315083	0.00361875	0.870697

[truncated: 4 more sheets: Comparison - paracetamol, Comparison - diazepam, Comparison - insulin, FTIR Spectra]
